# Supplementary material for: Monolayer platform to generate and purify human primordial germ cells in vitro provides new insights into germline specification
Source: Research Square preprint supplement (doi:10.21203/rs.3.rs-113078/v1), 2021-02-05
Supplement: Supplementary file 2 [file 2ed2fa14df3f9d584b7c4913.xlsx]

## Sheet: Sheet1
cluster	gene	Log_TMP_FGC_#1	Log_TMP_FGC_#2	Log_TMP_FGC_#3	Log_TMP_FGC_#4	Log_TPM_D3.5
Female_PGC#2	AAMDC	2.37283	5.22789	3.43965	2.11346	2.00232
Female_PGC#1	ABCA1	1.52175	0.400632	0.342699	1.43357	0.656652
Female_PGC#3	ABCA17P	0.270828	2.61026	4.15775	1.76498	0
Female_PGC#3	ABCA5	1.12647	2.21419	3.82244	3.30021	0.18596
Female_PGC#4	ABCC1	0.730794	0.496318	0.657981	2.59151	0.408097
Female_PGC#4	ABCD3	0.892554	1.39675	1.51624	2.53772	0.724263
Female_PGC#1	ABCF3	2.3596	1.17742	1.6641	1.79987	1.04429
Female_PGC#4	ABHD12B	0.459346	0.255163	0.383675	2.82311	0.243996
Female_PGC#2	ABHD14A	1.64307	3.42597	2.38547	2.76184	0.681423
Female_PGC#1	ABHD14B	1.36398	0.434343	0.212162	0.380087	0.69796
Female_PGC#4	ABHD2	0.898167	0.719407	0.474357	2.59199	0.279149
Female_PGC#4	ABLIM2	0.107868	0.0395457	0.104803	1.312	0.105754
Female_PGC#1	ABRACL	2.35576	0.866245	0.642915	0.51964	3.88884
Female_PGC#1	ACADS	1.30627	0.259661	0.144368	0.529496	0.40277
Female_PGC#4	ACAT1	2.31264	2.69907	1.53872	5.40206	1.6257
Female_PGC#3	ACBD3	1.99847	2.40385	3.64895	3.25142	1.60508
Female_PGC#4	ACE2	0.0246374	0.15488	0.181641	1.53312	0.0145176
Female_PGC#3	ACER3	0.821881	1.70903	2.36985	0.80994	0.550376
Female_PGC#4	ACO1	0.926641	1.82777	1.27715	3.43314	1.11644
Female_PGC#4	ACOT2	0.49499	0.509715	0.552873	1.48554	0.0296745
Female_PGC#4	ACOT4	0.399364	1.3955	0.602766	2.45946	0.0422008
Female_PGC#1	ACP5	1.24452	0.125124	0.00482654	0.102249	0.0720784
Female_PGC#3	ACRC	0.244858	1.8699	2.94594	2.10203	0.0268191
Female_PGC#1	ACSL4	2.00705	1.2516	0.658454	0.675903	0.845712
Female_PGC#3	ACSS2	0.377778	1.20154	1.86126	1.1392	0.285991
Female_PGC#1	ACTB	6.95694	5.28455	3.6606	5.72367	9.40319
Female_PGC#1	ACTG2	3.25749	0.295272	0.0270441	3.77256	5.99148
Female_PGC#4	ACTL8	0.1702	0.903883	0.270053	2.59375	0
Female_PGC#1	ACTN1	2.94791	0.873551	1.06651	2.52304	4.36038
Female_PGC#1	ACTR1A	2.48555	1.24973	1.09785	1.87207	3.23108
Female_PGC#3	ACTR3	2.16448	2.39488	3.43602	3.53315	3.92925
Female_PGC#2	ADA	0.343993	1.83109	0.502845	1.89992	0.449109
Female_PGC#3	ADAD1	0.15975	1.04078	2.45706	2.47821	0
Female_PGC#4	ADAD1	0.15975	1.04078	2.45706	2.47821	0
Female_PGC#3	ADAL	2.02299	3.75601	4.03191	3.4565	0.671712
Female_PGC#4	ADAMTS17	0.134962	0.153195	0.230338	2.13482	0
Female_PGC#4	ADARB2	0.0150028	0.00827989	0.103224	0.914401	0
Female_PGC#4	ADCY5	0.158936	0.174798	0.183774	1.45133	0.0156139
Female_PGC#4	ADCY9	0.12655	0.303275	0.235751	2.1349	0.00764052
Female_PGC#3	ADD1	2.12187	2.53909	3.42525	2.69438	1.95775
Female_PGC#1	ADD2	1.61654	0.392016	0.432799	1.09367	0.475023
Female_PGC#4	ADGRG6	0.212267	0.621497	1.58015	2.26966	0
Female_PGC#4	ADI1	2.46924	1.81193	1.06716	3.97796	3.68367
Female_PGC#1	ADIPOR1	2.06044	0.550004	0.67448	1.61221	2.06339
Female_PGC#3	ADNP2	1.01415	1.84873	2.75787	2.0398	0.88808
Female_PGC#3	ADSS	1.20822	2.07898	2.89364	3.14632	2.91869
Female_PGC#4	ADSS	1.20822	2.07898	2.89364	3.14632	2.91869
Female_PGC#1	AEN	2.44216	1.50854	1.27751	2.13029	1.83957
Female_PGC#4	AFAP1-AS1	0.0243515	0.0474529	0.0728685	1.10387	0
Female_PGC#4	AFF1	1.95549	1.7144	1.86521	4.80893	0.367992
Female_PGC#3	AFTPH	1.32394	2.03389	3.10337	2.17927	0.426217
Female_PGC#3	AGBL4	0.147155	0.259546	1.10192	0.349452	0.0100686
Female_PGC#3	AGBL4-IT1	0.0177689	0.0517908	0.724468	0.0113912	0
Female_PGC#4	AGGF1	2.12527	3.47274	2.99411	4.13236	1.21831
Female_PGC#1	AGPAT6	2.47154	1.15026	1.54701	1.55172	1.40276
Female_PGC#4	AGTRAP	2.35266	2.78498	1.44169	3.81901	2.49634
Female_PGC#3	AK1	1.09657	2.27952	2.85746	3.75454	1.54925
Female_PGC#4	AK1	1.09657	2.27952	2.85746	3.75454	1.54925
Female_PGC#1	AK4	2.91766	3.02416	1.40069	3.32587	2.84516
Female_PGC#3	AK7	0.133965	0.843409	1.70227	0.173682	0.0382104
Female_PGC#3	AK9	0.456979	2.54004	3.89102	1.68028	0.0849439
Female_PGC#1	AKAP1	2.16374	0.669535	0.64586	1.98584	1.92836
Female_PGC#2	AKAP11	2.11625	4.34294	3.7601	4.19432	0.632768
Female_PGC#1	AKAP12	4.04126	2.53503	1.69188	1.69913	6.74222
Female_PGC#1	AKR1A1	3.54864	2.0838	1.03971	2.28357	3.73615
Female_PGC#4	AKR1B1	4.48986	5.25591	4.34777	5.98423	4.886
Female_PGC#3	ALDH1A2	0.243218	0.72572	2.41826	2.7762	0.0101404
Female_PGC#4	ALDH1A2	0.243218	0.72572	2.41826	2.7762	0.0101404
Female_PGC#1	ALDH4A1	1.20951	0.485109	0.382859	0.801463	0.519291
Female_PGC#1	ALDH7A1	2.61218	1.00154	0.433075	0.555298	3.44199
Female_PGC#1	ALDOA	6.07661	5.37244	2.46836	4.59327	6.85491
Female_PGC#1	ALDOC	2.13454	1.00295	0.234187	0.655689	2.20873
Female_PGC#3	ALG13	1.77122	2.74086	5.04469	4.242	1.21982
Female_PGC#1	ALPL	3.13389	1.99572	0.580256	0.556886	3.16043
Female_PGC#1	ALPPL2	1.46577	0.131152	0.0536525	0.36811	0
Female_PGC#4	AMBP	0.0368216	0.0558654	0.130685	1.44853	0.0243784
Female_PGC#2	ANHX	0.862549	5.13166	1.49458	0.337058	0
Female_PGC#4	ANK3	0.40837	0.136661	0.278485	2.689	0.450857
Female_PGC#3	ANKIB1	1.17929	2.11442	2.95995	2.21539	0.682898
Female_PGC#3	ANKRD12	4.09238	4.88363	5.62692	4.56113	1.67303
Female_PGC#3	ANKRD30BP2	0.0103784	0.0556055	0.950855	0.0709995	0
Female_PGC#3	ANKRD31	0.362789	2.15094	3.88994	1.53064	0.0168201
Female_PGC#3	ANKRD32	2.56057	4.59656	4.64248	3.5674	1.05519
Female_PGC#4	ANKRD46	0.642757	1.86045	1.39975	2.32017	0.782184
Female_PGC#3	ANKRD50	0.575499	0.915641	2.73664	1.6709	0.307309
Female_PGC#3	ANKRD62	0.248535	0.930741	3.26582	0.776314	0.0261806
Female_PGC#3	ANKRD7	0.324364	1.421	3.21341	1.92147	0
Female_PGC#4	ANKS4B	0.00248976	0.0104662	0.0849056	1.1599	0.0138319
Female_PGC#4	ANO10	1.13703	1.66419	1.31635	4.15407	1.00674
Female_PGC#1	ANP32A	3.02564	1.44463	1.26739	1.87815	3.77356
Female_PGC#2	ANP32B	4.35418	5.69759	4.92311	4.5614	3.84832
Female_PGC#1	ANP32E	3.28821	2.93206	0.803255	0.851789	3.82318
Female_PGC#4	ANXA11	1.06005	2.01756	1.72154	2.79312	2.18404
Female_PGC#1	ANXA3	1.64147	0.147174	0.241874	0.739818	4.6362
Female_PGC#1	ANXA6	2.38216	0.688757	0.217268	2.13233	3.18948
Female_PGC#4	ANXA7	2.908	3.13873	1.5635	5.00817	2.46745
Female_PGC#1	AP2M1	5.31151	5.10127	3.2433	4.67182	6.26952
Female_PGC#1	APEX1	4.49605	2.87539	1.5739	2.60084	4.15281
Female_PGC#3	APIP	0.801814	1.34074	2.46407	2.10458	0.743923
Female_PGC#1	APOC1	4.51096	3.81171	1.21858	1.70253	3.41398
Female_PGC#1	APOC1P1	0.918786	0.113098	0.00280937	0.368038	0
Female_PGC#1	APOE	3.76728	1.04205	0.424526	0.361069	7.75132
Female_PGC#1	APRT	4.6048	3.65213	1.32212	2.87557	5.34564
Female_PGC#1	AQP3	1.14948	0.264435	0.109809	0.202424	2.03608
Female_PGC#4	ARAP2	0.11028	0.186311	0.725582	1.58054	0.0138415
Female_PGC#3	ARFGAP3	2.23314	3.74008	4.27025	2.59431	1.55291
Female_PGC#4	ARFIP2	1.05518	1.27131	2.0135	2.50836	1.19388
Female_PGC#4	ARG2	0.920337	1.15282	0.82109	2.81002	1.37072
Female_PGC#1	ARHGAP1	1.60058	0.609083	0.275114	0.961813	1.03135
Female_PGC#4	ARHGAP15	0.18211	0.0147678	0.109697	2.54274	0
Female_PGC#4	ARHGAP18	2.15948	1.7159	0.560809	5.18362	0.371742
Female_PGC#3	ARHGAP20	0.232671	0.435449	1.48875	0.346234	0
Female_PGC#3	ARHGAP5	2.5742	3.1546	5.38635	4.06468	0.925386
Female_PGC#3	ARHGAP9	0.242438	0.28122	1.50421	0.0809755	0
Female_PGC#4	ARHGEF33	0.48825	1.26867	1.99933	3.8719	0
Female_PGC#3	ARID2	1.03713	1.40005	2.62695	2.30371	0.712859
Female_PGC#3	ARID4B	2.84787	3.50356	4.79247	4.35694	2.62742
Female_PGC#1	ARID5B	2.62062	1.40184	0.256848	0.337042	3.73679
Female_PGC#3	ARIH2	2.61665	4.22193	4.6062	3.79645	2.156
Female_PGC#3	ARL1	2.47176	3.56162	4.2595	3.5755	2.43983
Female_PGC#3	ARL6	0.26365	0.394108	1.72814	0.760036	0.209162
Female_PGC#2	ARL6IP4	2.39746	4.15256	2.86835	4.32586	4.67455
Female_PGC#4	ARL6IP4	2.39746	4.15256	2.86835	4.32586	4.67455
Female_PGC#4	ARMC1	1.99204	1.77276	1.63983	3.38589	1.46517
Female_PGC#4	ARMC2	0.385402	0.553532	0.759264	3.12338	0.223299
Female_PGC#3	ARMC8	2.22959	2.92925	4.07771	4.26229	0.952912
Female_PGC#4	ARMC8	2.22959	2.92925	4.07771	4.26229	0.952912
Female_PGC#1	ARPC1B	3.28211	0.956842	0.163924	2.11439	4.57595
Female_PGC#3	ARPC5	3.91684	4.24337	5.19006	4.33964	4.8451
Female_PGC#3	ART3	0.10454	0.512032	2.1743	0.956809	0
Female_PGC#2	ASB9	0.283855	2.03722	0.0262355	0.179773	0
Female_PGC#3	ASF1B	0.947853	2.66522	2.99609	1.59887	1.42207
Female_PGC#4	ASGR2	0.0739515	0.158637	0.0102257	1.8407	0
Female_PGC#1	ASH2L	3.53189	2.81293	3.08647	2.55462	1.74639
Female_PGC#4	ASPH	1.31614	1.76657	1.42216	2.76602	0.734355
Female_PGC#1	ASRGL1	3.78261	2.84542	2.62335	3.71958	4.80561
Female_PGC#3	ASZ1	0.254672	1.47726	3.19547	1.37477	0
Female_PGC#4	ATAD3C	0.039147	0.0266517	0.0900591	1.84108	0.0891527
Female_PGC#4	ATG7	1.27774	1.24802	1.8003	4.50483	0.331228
Female_PGC#1	ATIC	3.26156	2.92123	1.26713	1.8385	2.63488
Female_PGC#3	ATL1	0.13712	0.773956	1.57815	0.564885	0.0386826
Female_PGC#2	ATOX1	3.64855	5.05323	2.499	4.42374	3.81535
Female_PGC#4	ATP2C2	0.0339683	0.0303218	0.10973	2.47787	0.0699232
Female_PGC#1	ATP5G1	4.66121	4.08187	1.66398	4.31565	4.18093
Female_PGC#3	ATP6AP1	2.22884	2.60786	5.26817	4.73821	2.68369
Female_PGC#4	ATP6AP1L	0.293842	0.643719	0.72687	2.35617	0.333143
Female_PGC#1	ATP6V1B1	1.00193	0.125879	0.0778343	0.0256731	0
Female_PGC#4	ATP6V1C1	2.3192	2.88553	1.56174	3.95778	0.93676
Female_PGC#2	ATP6V1D	2.95423	5.3653	3.86984	4.88248	2.29069
Female_PGC#4	ATP9A	0.341891	1.04471	0.51257	1.69397	0.0895479
Female_PGC#4	AURKC	0.293343	1.23461	1.62525	2.26999	0.0561508
Female_PGC#4	AVEN	0.42522	0.657436	0.374141	3.80118	0.448843
Female_PGC#2	B2M	2.97952	5.92863	6.12005	5.16641	2.92746
Female_PGC#3	B2M	2.97952	5.92863	6.12005	5.16641	2.92746
Female_PGC#2	B3GALNT1	0.577479	2.47846	1.99977	2.75075	0.0753189
Female_PGC#4	B3GALNT1	0.577479	2.47846	1.99977	2.75075	0.0753189
Female_PGC#4	B3GNT2	1.01896	0.37137	0.358164	2.84151	2.17862
Female_PGC#4	B3GNT4	0.272242	0.09495	0.0861649	1.49102	0.124556
Female_PGC#4	B4GALT6	0.329012	1.26997	1.33258	1.78702	0.064563
Female_PGC#4	BAALC	0.033424	0.0124531	0.0244523	2.7173	0.0797621
Female_PGC#4	BAIAP2	0.736188	1.30252	1.52137	2.74207	0.52975
Female_PGC#4	BAIAP2L1	0.701394	2.12195	2.49006	4.54396	0.784281
Female_PGC#3	BAZ1A	0.596388	3.17271	3.28791	4.12295	1.35507
Female_PGC#4	BAZ1A	0.596388	3.17271	3.28791	4.12295	1.35507
Female_PGC#3	BBIP1	0.543445	1.22305	1.99896	0.905301	0.765693
Female_PGC#3	BBS4	2.21391	2.9516	3.90597	2.99223	0.803643
Female_PGC#3	BCAP29	2.54705	4.24611	4.82115	4.31545	1.88586
Female_PGC#3	BCAP31	4.39446	5.99911	6.59314	5.47228	4.81901
Female_PGC#4	BCAR4	0.00318862	0	0.0208833	1.23397	0
Female_PGC#4	BCAS2	3.11119	3.02658	3.854	4.84034	2.82744
Female_PGC#1	BCL7A	2.06012	1.46876	0.752915	0.597532	1.04251
Female_PGC#3	BEND2	0.0628347	0.381366	2.89153	0.339891	0
Female_PGC#1	BFAR	2.97693	1.9029	1.68884	1.4983	3.06467
Female_PGC#2	BID	0.963894	1.65566	0.429524	0.262103	0.663164
Female_PGC#1	BIN1	2.27829	1.10712	0.248935	0.0734012	1.77242
Female_PGC#4	BIN3	0.711426	1.26359	1.569	2.902	0.731932
Female_PGC#1	BLCAP	2.58935	1.64106	1.84055	1.99617	1.77403
Female_PGC#2	BLOC1S1	2.15911	3.4111	1.29794	2.68584	3.15844
Female_PGC#4	BLOC1S6	1.18025	1.90298	2.36271	3.0724	1.02732
Female_PGC#2	BLVRA	1.27926	3.23373	2.28203	1.43242	1.43482
Female_PGC#1	BNIP3	4.64712	4.23949	2.56424	4.24967	3.65878
Female_PGC#3	BOLL	0.0398811	0.300138	1.6104	0.433723	0
Female_PGC#4	BPGM	1.30268	2.44056	2.18797	3.35505	0.790393
Female_PGC#1	BPHL	1.8212	1.09852	0.455526	0.743057	1.61704
Female_PGC#3	BRD2	3.451	3.36709	4.6351	3.72014	1.98103
Female_PGC#3	BRD8	3.29302	3.6637	5.22746	2.97619	1.21995
Female_PGC#4	BRDT	2.48366	1.90773	3.57345	6.16108	0.159188
Female_PGC#4	BRI3	1.37921	2.39873	2.15618	2.89262	2.6028
Female_PGC#4	BRMS1	2.03289	2.6812	2.34273	3.63696	2.20374
Female_PGC#3	BRWD1	2.94613	4.67426	5.15699	4.98571	1.50786
Female_PGC#3	BTAF1	2.40002	2.29151	4.15581	2.5739	0.417279
Female_PGC#3	BTBD10	1.82756	3.15353	3.86453	3.02507	1.17135
Female_PGC#3	BTBD18	0.133891	0.63053	1.38102	0.646163	0
Female_PGC#1	BTF3	5.94917	4.88884	4.17174	5.2098	7.027
Female_PGC#1	BTF3L4	4.21776	3.86924	3.32208	3.47748	4.23331
Female_PGC#3	BTG3	3.30496	5.07029	5.51025	2.81791	1.57987
Female_PGC#4	BTG4	0.00586274	0.0135829	0.220202	1.81402	0
Female_PGC#1	BYSL	2.18625	1.6743	1.02001	1.22706	1.27463
Female_PGC#3	C10orf88	0.539682	1.67803	2.77564	2.00122	0.387681
Female_PGC#3	C11orf24	0.824672	1.48442	2.67397	1.91876	0.610086
Female_PGC#3	C11orf65	0.727246	2.11523	3.03086	1.86466	0.0640437
Female_PGC#3	C11orf70	0.336291	1.01922	3.19483	0.587851	0.0216813
Female_PGC#3	C11orf85	0.369198	0.970939	4.18738	1.142	0
Female_PGC#3	C14orf39	0.301836	1.47844	4.69739	2.93359	0.0151251
Female_PGC#3	C15orf43	0.262732	0.171527	2.3965	0.187355	0
Female_PGC#3	C15orf48	0.31027	1.18398	3.56845	3.0268	0
Female_PGC#4	C15orf48	0.31027	1.18398	3.56845	3.0268	0
Female_PGC#4	C16orf74	0.20585	1.00809	0.212151	2.27901	0.149617
Female_PGC#3	C16orf95	0.269849	1.15681	2.82214	1.70885	0.092815
Female_PGC#3	C17orf104	0.166833	1.95344	3.55998	1.37281	0.0975407
Female_PGC#3	C17orf75	1.64321	3.68348	4.62496	2.81246	0.9635
Female_PGC#4	C17orf85	1.71322	2.32224	2.73701	3.25714	1.90213
Female_PGC#3	C18orf63	0.0393429	0.400811	3.57779	0.6335	0
Female_PGC#3	C19orf38	0.224291	0.840158	2.48994	2.31848	0.0185528
Female_PGC#4	C19orf38	0.224291	0.840158	2.48994	2.31848	0.0185528
Female_PGC#3	C1D	1.72087	2.24736	3.3577	3.2134	1.80251
Female_PGC#3	C1orf105	0.0192597	0.185355	1.40792	0.0338508	0.0252544
Female_PGC#3	C1orf146	0.254789	1.44995	3.72287	1.84158	0
Female_PGC#1	C1QBP	3.59047	3.0394	2.01833	3.08542	4.62171
Female_PGC#4	C1S	0.560316	0.496741	0.614483	1.83622	0.112833
Female_PGC#4	C20orf196	0.924282	1.52332	1.37887	2.87365	0.383815
Female_PGC#4	C20orf96	0.507054	0.809999	0.641032	2.06097	0.198476
Female_PGC#4	C2orf61	0.0064297	0.00702863	0.0287158	1.25538	0
Female_PGC#4	C3orf33	0.395613	0.560627	0.533962	2.14088	0.145496
Female_PGC#2	C4orf48	3.4987	5.25445	3.85333	5.111	3.36561
Female_PGC#1	C5orf15	2.50877	1.28155	1.42468	0.890042	2.28326
Female_PGC#3	C5orf42	0.982938	2.43195	3.12102	1.72165	0.393394
Female_PGC#3	C5orf47	0.46992	3.19989	5.37914	4.22615	0
Female_PGC#3	C5orf58	1.22445	2.37708	4.32406	2.8396	0.00745371
Female_PGC#4	C6orf165	0.38622	1.01979	0.992073	2.42599	0
Female_PGC#3	C6orf203	1.78842	2.71654	3.80206	2.54355	0.858899
Female_PGC#1	C6orf48	4.02012	2.64458	1.59276	1.56904	2.98647
Female_PGC#4	C6orf52	0.825196	2.19602	1.54947	4.08389	0.137328
Female_PGC#4	C8orf37-AS1	0.12664	0.164946	0.154648	1.26145	0
Female_PGC#3	C9orf43	0.282112	0.83378	2.48209	0.724049	0
Female_PGC#3	C9orf84	0.135492	1.18267	3.08557	0.600632	0
Female_PGC#1	CA2	1.25844	0.0365384	0.128675	0.109236	2.96059
Female_PGC#4	CABLES1	0.417475	0.433138	0.235001	1.71011	0.444447
Female_PGC#4	CABYR	1.69812	1.90589	2.38548	4.57959	0.922141
Female_PGC#4	CACNA2D1	0.208655	0.192653	0.244699	2.78503	0.100132
Female_PGC#4	CADM1	0.579485	1.60144	1.02345	2.81273	0.310833
Female_PGC#4	CADPS2	0.188416	0.31579	0.596159	1.80898	0.00707822
Female_PGC#4	CALB2	0.0928095	0.521451	0.996815	2.01138	0.00740171
Female_PGC#2	CALCOCO2	2.05124	4.81156	3.02383	2.52016	1.29843
Female_PGC#1	CALD1	2.7779	0.79535	0.720935	0.332297	4.88774
Female_PGC#4	CALN1	0.233163	0.463083	0.757893	1.32135	0
Female_PGC#3	CAMSAP1	0.932261	1.67732	2.58236	1.92126	0.412945
Female_PGC#3	CAND1	1.91088	2.50005	3.45406	2.5144	1.4054
Female_PGC#4	CAND2	0.377171	0.586432	0.575559	2.67489	0.153632
Female_PGC#1	CAPG	2.97842	1.47936	0.584458	0.46515	4.28024
Female_PGC#4	CAPN12	0.173636	0.0596476	0.284161	2.1905	0.610615
Female_PGC#4	CAPRIN2	1.49916	3.54359	3.79341	4.97402	0.806841
Female_PGC#4	CAPZA2	2.20638	3.12738	3.19759	4.46487	2.2158
Female_PGC#1	CARHSP1	3.21542	2.76892	1.05921	2.78659	6.30748
Female_PGC#3	CASC5	2.04701	4.70689	4.64443	2.97291	0.955449
Female_PGC#4	CAST	0.892441	0.961799	1.75499	4.107	0.543828
Female_PGC#4	CATSPERD	0.00582543	0.0392059	0.0485274	1.57887	0
Female_PGC#4	CBFA2T3	0.183591	0.208977	0.534521	1.64661	0.135295
Female_PGC#4	CBR1	0.925268	1.457	1.44093	2.57005	1.76296
Female_PGC#4	CCBE1	0.0747137	0.0446278	0.138458	1.6299	0.0312726
Female_PGC#4	CCDC110	0.115619	0.664608	1.33316	2.14504	0.00727081
Female_PGC#3	CCDC122	0.397185	1.32323	2.53939	1.29176	0.100776
Female_PGC#1	CCDC144CP	2.49476	1.69777	1.36279	1.18342	0
Female_PGC#3	CCDC152	1.15271	3.59266	4.51259	0.641674	0.120459
Female_PGC#3	CCDC155	0.29602	0.683287	2.62019	0.827069	0.0269966
Female_PGC#3	CCDC172	0.43812	0.551355	2.87057	0.856378	0
Female_PGC#3	CCDC173	0.258099	1.46388	2.12785	0.784059	0.0148078
Female_PGC#3	CCDC18	2.14988	3.11155	3.8528	1.91301	1.46797
Female_PGC#3	CCDC181	1.31506	2.43335	3.83404	2.47649	0.373212
Female_PGC#3	CCDC28A	1.36777	2.74255	3.09376	1.96202	0.736412
Female_PGC#3	CCDC36	0.134476	0.509857	1.77799	0.21284	0
Female_PGC#4	CCDC50	1.87845	1.76059	3.05714	3.65221	2.90677
Female_PGC#4	CCDC6	1.54723	1.54222	1.08578	3.21568	0.738292
Female_PGC#3	CCDC66	1.83272	2.38131	3.52499	1.471	1.09691
Female_PGC#3	CCDC7	0.353576	1.12581	2.50351	0.875989	0.0410692
Female_PGC#3	CCDC73	0.348293	2.53075	5.62114	3.86666	0
Female_PGC#3	CCDC79	0.11505	1.64018	2.92982	1.70208	0
Female_PGC#3	CCDC88A	2.91329	4.34418	5.32352	4.04409	1.08616
Female_PGC#4	CCDC88C	0.231141	0.861089	1.12113	3.31002	0.326218
Female_PGC#3	CCDC92	0.300358	0.903486	1.68541	0.527941	0.553264
Female_PGC#3	CCDC93	1.91691	2.68647	4.33374	3.93092	0.868791
Female_PGC#4	CCM2L	0.0932711	0.00229627	0.213324	1.54427	0.0927679
Female_PGC#3	CCNB1IP1	2.33189	3.89967	4.87476	3.92602	2.45158
Female_PGC#3	CCNB3	0.20421	1.04251	2.90439	1.17484	0
Female_PGC#2	CCND1	0.756461	2.61291	0.662523	0.739318	2.17596
Female_PGC#3	CCNE2	0.28976	0.850195	2.35014	0.529698	0.130093
Female_PGC#4	CCNH	1.99965	2.4125	2.66754	3.61671	1.40633
Female_PGC#4	CCNI	4.19932	5.10717	4.36209	6.2561	5.65682
Female_PGC#4	CCNI2	0.261119	0.707917	0.523263	1.56571	0.0276667
Female_PGC#2	CCNO	0.751251	3.31137	2.65985	2.52152	0.692571
Female_PGC#1	CCPG1	1.50926	1.25561	0.279754	0.532186	2.5506
Female_PGC#3	CCT6B	0.284187	2.3737	3.33024	1.46378	0.0221685
Female_PGC#4	CCZ1	0.65351	0.74005	1.26304	2.16396	3.13052
Female_PGC#3	CD46	1.63234	2.85671	3.64989	2.96672	1.33462
Female_PGC#1	CD47	3.34089	2.47603	2.3755	2.14245	0.698165
Female_PGC#3	CD55	1.68871	2.7261	3.56789	2.4473	0.498415
Female_PGC#4	CD59	2.59018	3.55203	3.68051	4.53552	3.1827
Female_PGC#1	CD63	5.46683	3.80985	2.21339	1.28213	6.34571
Female_PGC#2	CD74	1.5476	2.2135	0.860784	0.556836	0.52103
Female_PGC#1	CD81	3.5972	2.42496	1.24235	1.77652	2.42658
Female_PGC#4	CD82	3.52991	3.93726	6.0187	7.19738	0.0133884
Female_PGC#1	CD9	4.40929	2.90071	2.37583	3.48852	5.33703
Female_PGC#4	CDC42	3.24814	3.42123	3.89705	4.79303	4.71888
Female_PGC#1	CDC42EP4	1.78782	0.213239	0.186674	0.118261	1.98423
Female_PGC#3	CDC42SE2	2.28598	3.16238	3.88701	2.90536	0.852507
Female_PGC#3	CDC45	1.24155	2.4994	3.58986	1.156	0.900055
Female_PGC#1	CDCA7	3.04516	2.30665	0.974256	0.642882	2.93623
Female_PGC#4	CDH1	0.255873	0.144935	0.398838	1.61797	0.631854
Female_PGC#4	CDIP1	0.842984	1.39668	1.97065	2.6234	1.11179
Female_PGC#3	CDK12	2.60143	3.11438	4.31471	3.79687	1.76039
Female_PGC#3	CDK13	1.04926	1.70004	2.55694	1.37028	1.00353
Female_PGC#2	CDK2AP1	2.57281	4.27269	1.78753	1.52192	0.563689
Female_PGC#1	CDK4	3.3529	2.76866	1.70239	1.34875	3.71936
Female_PGC#3	CDKL2	0.128669	1.3323	2.77374	1.16996	0.00840106
Female_PGC#4	CDKN1B	0.635869	0.885552	1.13861	2.15996	0.677503
Female_PGC#2	CDKN2D	0.380596	3.76054	2.59659	1.11869	0.538525
Female_PGC#2	CDKN3	1.83305	4.28641	1.35651	1.8436	2.03773
Female_PGC#1	CDO1	1.47128	0.335793	0.373994	0.00457431	0.970271
Female_PGC#1	CENPA	1.60083	0.586446	0.238473	0.20774	1.83173
Female_PGC#3	CENPU	2.1451	4.67238	5.66883	3.65509	2.05492
Female_PGC#3	CEP120	0.785417	1.41674	2.32842	0.926851	0.204595
Female_PGC#3	CEP350	2.62748	3.20715	4.78938	4.0364	1.22215
Female_PGC#3	CEP63	2.58888	3.97175	4.31129	3.60093	0.662783
Female_PGC#1	CERS5	2.0549	0.953894	0.751577	0.453436	1.47695
Female_PGC#4	CFAP58	0.117549	0.320287	0.413828	2.19143	0
Female_PGC#3	CFAP70	0.497377	1.95687	3.0158	1.09897	0
Female_PGC#2	CFAP97	2.1722	3.74024	2.50845	2.07647	0
Female_PGC#4	CFD	0.552074	0.562487	0.359768	2.65396	0.787782
Female_PGC#3	CFL2	1.18089	3.14885	3.61821	4.16432	0.638671
Female_PGC#4	CFL2	1.18089	3.14885	3.61821	4.16432	0.638671
Female_PGC#1	CFLAR	4.2174	2.59497	2.94487	2.51561	0.89935
Female_PGC#3	CHAF1A	1.09301	2.07072	3.34342	2.66422	2.39602
Female_PGC#4	CHD7	1.55649	2.66105	2.77003	4.20091	2.2198
Female_PGC#3	CHIC2	1.54537	2.69968	5.1132	4.1262	0.803203
Female_PGC#2	CHMP2A	3.37899	4.96826	2.76411	3.87382	4.21025
Female_PGC#3	CHMP2B	2.48353	2.2648	3.96621	4.17694	2.00106
Female_PGC#1	CHMP4A	1.64136	0.326749	0.248492	0.283506	2.68726
Female_PGC#4	CHORDC1	2.14039	2.7811	3.1206	4.11617	1.6603
Female_PGC#1	CHP1	2.76552	1.77952	0.514731	1.10064	2.22202
Female_PGC#4	CHRNA3	0.57974	0.877103	0.399248	3.58411	0.366599
Female_PGC#4	CHRNA7	0.315236	0.346435	0.705368	2.14643	0.0330122
Female_PGC#3	CIAPIN1	2.8752	3.31323	4.5088	3.90832	3.07178
Female_PGC#3	CIPC	0.31351	0.853538	1.82056	0.73137	0.124248
Female_PGC#3	CISD2	2.25155	2.64091	4.32363	3.86319	2.78838
Female_PGC#4	CKAP4	0.777514	1.71344	1.60031	2.5072	1.7008
Female_PGC#3	CKLF	1.47385	2.42998	2.71381	1.54143	1.1364
Female_PGC#1	CKS1B	4.53199	4.48995	2.88508	4.10074	5.48738
Female_PGC#1	CLDN6	0.700194	0.0215308	0.0401262	0.0870861	6.15017
Female_PGC#1	CLDN7	1.11175	0.655683	0.040725	0.117779	3.84086
Female_PGC#4	CLEC16A	0.417404	0.57065	0.897172	1.95788	0.141808
Female_PGC#3	CLGN	0.0561439	0.678883	1.68287	0.184941	0.00706655
Female_PGC#1	CLIC1	3.44017	1.47818	1.20822	0.602623	5.06052
Female_PGC#4	CLIP4	0.165024	0.42664	1.35907	2.35715	0.135183
Female_PGC#3	CLNS1A	1.85762	3.39791	4.52534	3.43146	3.64433
Female_PGC#4	CLOCK	2.02206	3.57417	3.38956	4.25807	0.467422
Female_PGC#3	CLUAP1	2.25092	3.27295	3.95976	3.01633	0.802916
Female_PGC#4	CLUH	0.75171	0.64193	0.952351	2.23424	0.344364
Female_PGC#4	CMC4	1.33933	1.86083	2.05827	3.19975	0.0762162
Female_PGC#4	CMPK1	1.30761	2.00151	1.60044	2.9215	1.44338
Female_PGC#2	CMTM7	0.907793	2.14525	0.857753	1.8067	1.04965
Female_PGC#1	CNN2	2.29746	1.51511	0.261156	0.232505	4.30942
Female_PGC#4	CNN3	2.64476	2.76965	1.43246	3.87292	3.74794
Female_PGC#1	CNNM3	2.46109	2.27111	0.831424	0.957217	0.123879
Female_PGC#4	CNOT11	0.644936	1.37377	1.91617	2.97175	1.17988
Female_PGC#4	CNRIP1	0.67805	0.308326	1.04232	3.66558	0
Female_PGC#3	CNTD1	0.0274018	0.748701	2.07943	0.393456	0.00755559
Female_PGC#3	CNTLN	2.8748	2.6118	4.22345	2.29154	1.92217
Female_PGC#4	CNTN4	0.249128	0.256979	0.225157	1.70086	0.345213
Female_PGC#4	CNTNAP2	0.405989	0.488916	0.205142	2.44207	1.22205
Female_PGC#3	CNTRL	1.514	2.8604	4.68069	2.64913	0.703192
Female_PGC#1	COA4	2.58535	1.92364	0.940415	1.49616	2.7529
Female_PGC#3	COA5	1.38421	1.73213	2.91182	2.46489	1.31476
Female_PGC#1	COA7	1.86771	1.16165	0.581225	1.11011	0.866303
Female_PGC#4	COCH	0.196208	0.684952	0.804338	2.85801	0.739921
Female_PGC#3	COG4	2.07581	2.54643	3.62784	2.50358	1.53495
Female_PGC#3	COG6	1.25548	3.00576	3.01574	2.55533	0.298775
Female_PGC#1	COL4A1	2.42063	0.473277	0.317418	0.123548	1.60867
Female_PGC#1	COL4A2	1.9768	0.590863	0.543421	0.496835	2.18125
Female_PGC#4	COMMD2	1.75062	2.04242	2.77462	3.67941	1.62459
Female_PGC#4	COMMD7	1.09253	0.938407	1.10823	2.63472	1.16341
Female_PGC#1	CORO1B	1.48487	0.355005	0.192158	0.605425	3.70824
Female_PGC#4	COX4I2	0.0504913	0.0417674	0.0518189	2.9525	0.00929938
Female_PGC#2	COX7A1	0.568011	1.58845	0.128017	0.934663	0
Female_PGC#4	COX7A2L	4.40204	5.30699	4.74782	5.87253	5.02444
Female_PGC#1	COX8A	4.89341	3.65677	2.11987	3.49211	4.93936
Female_PGC#3	COX8C	0.694077	4.0341	4.94998	5.32539	0
Female_PGC#4	COX8C	0.694077	4.0341	4.94998	5.32539	0
Female_PGC#2	CPE	0.152308	1.50838	0.789308	0.470759	0.277043
Female_PGC#1	CRIP1	3.48598	1.93931	0.306	0.429548	0.842816
Female_PGC#1	CRIP2	2.64462	1.69238	1.12252	0.481949	3.12336
Female_PGC#4	CRISPLD1	0.442148	0.533341	1.51325	1.82557	0.224927
Female_PGC#3	CRNDE	1.08099	1.91215	3.45497	2.65102	0.0845659
Female_PGC#1	CRTAP	2.96839	1.81866	0.475969	0.482827	2.22436
Female_PGC#3	CRYBG3	0.357525	0.990946	2.27397	1.54077	0.176204
Female_PGC#4	CRYZ	1.37572	1.61006	1.35153	3.82755	0.377278
Female_PGC#4	CSF1R	0.694867	0.125457	0.0714056	2.67524	0.00593942
Female_PGC#3	CSMD3	0.224961	0.594673	1.64734	0.449278	0.0282547
Female_PGC#4	CSNK2B	3.61007	4.86398	4.88153	5.31703	4.11573
Female_PGC#3	CSPP1	2.24755	2.3411	4.05845	2.42448	0.735567
Female_PGC#4	CSRP2	1.07713	2.32724	1.47262	3.91003	2.51063
Female_PGC#2	CST3	3.92349	5.08729	3.66548	3.29587	2.5183
Female_PGC#1	CSTB	4.06454	2.47329	1.05191	3.07004	5.32229
Female_PGC#3	CSTF3	1.63618	2.7657	3.69266	1.56659	1.47106
Female_PGC#4	CTAGE5	2.21459	2.62464	3.085	3.70522	0.125425
Female_PGC#4	CTB-178M22.2	0.0256616	0.00672198	0.0433174	2.02382	0.0258068
Female_PGC#3	CTCFL	0.122428	1.93694	2.72924	1.39171	0
Female_PGC#4	CTD-2201I18.1	0.0119824	0.0339054	0.0848194	0.966411	0
Female_PGC#3	CTNNB1	1.83288	2.10375	3.09821	1.9128	2.04919
Female_PGC#1	CTPS1	2.76541	2.46578	1.42633	1.38459	1.48963
Female_PGC#4	CTRB2	0.0496993	0.0518163	0.319928	5.4259	0
Female_PGC#2	CTRL	0.0901915	1.41763	0.210148	0.0697231	0
Female_PGC#1	CTSA	1.45874	0.409516	0.248688	0.868722	2.25795
Female_PGC#4	CTSB	2.91368	2.67269	1.96116	4.2501	2.10235
Female_PGC#4	CTSF	0.485695	1.38925	1.78871	2.20337	0.098627
Female_PGC#4	CTSH	1.26958	2.43801	1.66326	4.25521	0.515541
Female_PGC#4	CTSW	0.0310678	0.0104958	0.0834594	1.79703	0
Female_PGC#3	CUL4B	1.06625	2.29388	3.16881	3.26965	0.597508
Female_PGC#4	CUL4B	1.06625	2.29388	3.16881	3.26965	0.597508
Female_PGC#4	CUL5	2.03768	3.33262	3.12645	4.42931	1.38085
Female_PGC#3	CUTC	1.18417	1.36174	3.145	3.12335	0.931886
Female_PGC#4	CUX1	0.808374	0.612534	0.447009	2.1412	1.15237
Female_PGC#3	CXorf58	0.0946489	0.637244	1.97027	0.114777	0.00833679
Female_PGC#2	CXorf67	0.661722	2.90627	2.75233	2.88468	0
Female_PGC#1	CXXC5	1.73379	0.764865	0.478237	0.88542	2.78221
Female_PGC#1	CYCS	5.21802	4.69765	3.90964	3.87924	4.25777
Female_PGC#2	CYP26A1	0.0721347	2.81282	0.453814	0.0695244	0.00819248
Female_PGC#1	CYP2S1	1.78759	0.291247	0.0806144	0.136891	2.59607
Female_PGC#4	CYSTM1	2.02977	1.909	3.881	4.21121	1.80724
Female_PGC#4	DAAM1	1.45047	2.02595	2.35021	3.94696	1.76968
Female_PGC#2	DAZL	1.98246	4.89312	4.51812	3.26397	0
Female_PGC#3	DAZL	1.98246	4.89312	4.51812	3.26397	0
Female_PGC#1	DCAF4	1.70222	1.30705	0.727475	0.82648	0.584911
Female_PGC#3	DCAF4L1	1.90199	3.8379	3.96114	3.85326	0
Female_PGC#4	DCDC2	0.0815569	0.341023	0.3912	1.72874	0
Female_PGC#4	DCT	0.0178243	0.0829398	0.195885	1.27721	0
Female_PGC#2	DCTN3	2.03483	4.00947	3.05609	2.88341	2.32784
Female_PGC#2	DCTN4	1.56835	3.26666	2.35146	1.80546	0.492222
Female_PGC#1	DCXR	3.53614	2.6092	0.710064	2.23472	3.04339
Female_PGC#3	DDAH1	0.228146	0.486445	1.44559	0.968925	0.0457523
Female_PGC#3	DDHD2	0.899095	1.62273	2.90005	2.42857	0.551575
Female_PGC#1	DDIT4	4.81801	2.38087	1.10091	2.08077	4.75096
Female_PGC#1	DDIT4L	1.75551	0.488108	0.23656	0.351269	1.61828
Female_PGC#2	DDX24	4.54626	6.45937	6.27949	5.18525	3.38899
Female_PGC#3	DDX4	1.51521	4.86559	5.40291	4.69792	0
Female_PGC#1	DDX47	2.40176	1.30767	1.48918	1.62748	0.0402742
Female_PGC#4	DDX59	0.87936	1.39005	1.75683	2.61225	0.282956
Female_PGC#3	DECR1	1.86484	3.00541	3.66849	3.43059	1.1309
Female_PGC#4	DEDD	0.9945	1.69234	1.85796	2.99017	0.428403
Female_PGC#4	DEGS2	0.270316	0.193589	0.0433237	2.17057	0.025832
Female_PGC#3	DENND1B	0.335013	0.994633	2.3603	1.23358	0.0452483
Female_PGC#3	DEPDC1	0.855048	2.06125	3.22913	1.38114	0.709232
Female_PGC#2	DERL3	0.43313	3.52113	2.7778	2.64655	0.241574
Female_PGC#1	DFFA	2.66968	1.38352	1.36316	1.66676	3.34133
Female_PGC#4	DFNA5	0.484472	1.34212	0.312215	2.5041	0.143419
Female_PGC#3	DGAT2	0.943737	1.62147	2.991	2.21869	0.457328
Female_PGC#4	DGKB	0.129705	0.00894198	0.176221	2.29799	0
Female_PGC#3	DGKE	0.496654	1.39804	1.93279	1.48305	0.0766447
Female_PGC#2	DGUOK	3.61613	5.21988	4.54463	3.36345	4.13094
Female_PGC#4	DGUOK-AS1	0.0191792	0.0214701	0.0206412	1.02555	0
Female_PGC#1	DHTKD1	2.14922	0.732527	0.683707	0.479986	2.02829
Female_PGC#3	DHX29	3.66198	4.9432	5.52295	5.29028	2.30586
Female_PGC#1	DHX33	1.69965	0.782639	0.856929	0.750726	0.868363
Female_PGC#3	DHX40	1.77435	3.07393	3.64775	2.30992	0.74314
Female_PGC#4	DIP2C	0.551848	0.822713	1.72374	3.30539	0.219355
Female_PGC#2	DKC1	3.26955	5.31172	4.29175	3.98438	2.75848
Female_PGC#1	DLGAP1-AS2	0.966884	0.0336686	0.0178177	0.0342583	0.403576
Female_PGC#2	DLK1	1.33423	1.85209	0.383787	0.203474	4.21652
Female_PGC#3	DLX5	0.0738719	1.49758	2.30444	1.3045	0.0237531
Female_PGC#3	DLX6	0.0890299	0.940321	1.77896	1.55993	0.01554
Female_PGC#3	DMC1	0.514325	0.926501	2.47456	0.50325	0.0570632
Female_PGC#1	DMD	4.14177	2.97842	1.63149	4.57173	2.4418
Female_PGC#3	DMRTB1	0.17627	1.91322	3.29167	1.23214	0
Female_PGC#3	DMRTC2	0.109855	1.13504	3.95454	2.15835	0
Female_PGC#3	DMXL2	1.39591	2.72688	3.52745	3.36611	0.141983
Female_PGC#4	DNAH10	0.341459	0.577837	0.361919	3.75863	0.0335346
Female_PGC#4	DNAH11	0.102539	0.147018	0.163616	2.7397	0.157843
Female_PGC#4	DNAH12	0.0876289	1.00519	1.87565	2.79062	0
Female_PGC#4	DNAH3	0.130491	0.639737	0.82787	2.70092	0
Female_PGC#4	DNAH9	0.0604245	0.0846875	0.084475	1.83147	0.0647942
Female_PGC#3	DNAJA4	0.913852	1.97169	2.95237	2.21652	0
Female_PGC#3	DNAJB11	1.90701	2.77649	3.64145	3.72778	3.37314
Female_PGC#4	DNAJB13	0.0427304	0.0571529	0.036708	2.42588	0.00791154
Female_PGC#3	DNAJB9	1.91647	2.83387	4.4064	3.0683	1.74886
Female_PGC#3	DNAJC1	2.60049	3.81421	4.1681	3.36282	1.70447
Female_PGC#4	DNAJC10	2.21581	2.38169	3.55003	3.96858	1.19405
Female_PGC#2	DNAJC4	1.1385	2.58286	1.37062	1.61313	2.42268
Female_PGC#3	DNAL1	1.33903	1.99111	2.95457	1.67689	0.263077
Female_PGC#2	DNM1L	2.58014	4.59794	3.7138	3.61339	1.77654
Female_PGC#2	DNMT1	2.94003	4.72688	4.03806	3.77469	2.88147
Female_PGC#1	DOCK11	1.70879	1.07269	0.870806	0.485384	1.33889
Female_PGC#2	DPCD	2.44208	4.4944	3.69009	3.53555	2.52139
Female_PGC#3	DPEP3	0.542971	3.1663	3.93179	2.26582	0.016387
Female_PGC#4	DPP6	0.161677	0.0679299	0.0581185	1.83942	0.0929905
Female_PGC#4	DPPA3	2.17857	0.774663	0.263472	4.47545	0.0202846
Female_PGC#1	DPPA4	3.34728	2.07755	0.581384	0.298011	3.29229
Female_PGC#1	DPPA5	2.89582	0.518568	1.49606	4.34957	0
Female_PGC#1	DPYSL2	3.41977	2.06814	0.707552	1.24991	2.30816
Female_PGC#3	DR1	1.0898	1.04513	2.37605	1.50027	2.62686
Female_PGC#1	DSP	1.90115	0.459408	0.609519	0.93902	2.91391
Female_PGC#2	DTD1	1.22964	3.2739	2.86859	2.8279	2.37825
Female_PGC#4	DUSP22	1.57159	3.00623	2.76496	4.03725	0.770049
Female_PGC#4	DUSP23	1.52276	2.17896	0.737787	4.10111	1.92509
Female_PGC#2	DUSP9	0.152308	1.34264	0.1009	0.211425	0.240886
Female_PGC#3	DUT	3.31207	3.9441	5.42023	4.34359	2.35931
Female_PGC#3	DYDC1	0.050099	0.752472	2.45976	0.271472	0
Female_PGC#4	DYSF	0.474602	0.347955	0.357506	2.94934	0.217551
Female_PGC#3	DZIP3	2.86503	3.18279	5.92104	3.98465	1.16857
Female_PGC#4	EAF1	0.654736	0.617454	1.21843	2.23754	0.426928
Female_PGC#3	EAF2	0.705203	1.35329	2.73492	1.05833	0.0600631
Female_PGC#3	EBAG9	1.13218	1.98099	3.15022	2.26704	0.81969
Female_PGC#2	ECI2	3.16384	5.05905	3.0643	2.68011	2.32945
Female_PGC#1	EEF1A1	9.04427	7.37757	5.7332	6.82117	9.16146
Female_PGC#1	EEF1G	7.37742	6.45806	4.85653	5.37725	0.487149
Female_PGC#1	EEF2	5.89106	4.61487	3.31182	5.04834	7.29665
Female_PGC#4	EEF2K	0.472008	0.311278	0.180868	1.90742	0.102891
Female_PGC#4	EFCAB10	0.0263926	0.00591858	0.0858708	1.33064	0.0498389
Female_PGC#3	EFCAB13	0.673946	1.60911	3.60483	1.7	0.0187248
Female_PGC#3	EFCAB7	0.745469	1.49651	2.97249	0.781198	0.0836245
Female_PGC#1	EFEMP1	2.29467	0.933653	0.381047	0.322306	2.12211
Female_PGC#4	EHMT2	0.75195	1.53029	1.5277	2.34461	1.08272
Female_PGC#4	EI24	2.17851	3.07404	2.30446	4.1884	3.70708
Female_PGC#3	EID3	0.7185	1.67578	3.47764	1.77885	0.0659801
Female_PGC#1	EIF1AX	5.25524	4.82917	3.51763	5.37013	3.60431
Female_PGC#3	EIF1B	2.9428	4.33523	5.34772	5.11191	2.23341
Female_PGC#1	EIF2S3	3.93698	3.40637	2.83772	2.78064	3.82472
Female_PGC#1	EIF3F	4.76034	3.94032	2.96228	3.14653	5.79604
Female_PGC#1	EIF3I	4.49978	4.02103	2.32584	3.05232	4.67345
Female_PGC#1	EIF3K	5.74211	5.50056	4.25878	4.57986	6.21802
Female_PGC#1	EIF3L	5.66969	4.82202	4.42982	4.08881	5.97949
Female_PGC#1	EIF3M	2.89288	2.20363	1.81422	2.0489	3.9956
Female_PGC#1	EIF4B	3.65444	2.44036	2.07379	2.81861	4.48824
Female_PGC#4	EIF4ENIF1	1.08204	1.17878	1.45896	3.13812	0.855831
Female_PGC#1	EIF6	4.3378	3.56182	2.66269	2.93523	4.03159
Female_PGC#4	ELAVL2	1.84889	3.77133	2.14616	4.22208	0.125835
Female_PGC#1	ELF3	1.0625	0.178874	0.0645282	0.180044	0.898847
Female_PGC#1	ELK3	1.92821	0.671073	0.289272	1.58827	0.592269
Female_PGC#4	ELOF1	3.13708	2.96649	2.72758	4.60549	2.67252
Female_PGC#3	ELOVL2-AS1	0.0834635	0.422962	1.4463	0.55863	0
Female_PGC#1	ELOVL3	1.22928	0.43779	0.117986	0.584179	1.17873
Female_PGC#1	ELOVL6	3.3738	2.19786	0.342478	0.879291	4.42066
Female_PGC#4	EMB	0.495657	0.376707	1.10836	3.02956	3.18524
Female_PGC#3	EMC2	2.35351	4.20156	4.62899	3.30091	1.86179
Female_PGC#1	EMG1	3.8406	3.46223	1.89038	2.2311	2.78805
Female_PGC#4	EML6	0.396849	0.327737	0.32098	2.60625	0.00691257
Female_PGC#4	ENAH	2.36339	2.11607	2.49266	4.5934	3.35898
Female_PGC#1	ENC1	2.31262	0.591174	0.199681	0.13901	2.09482
Female_PGC#1	ENO1	6.36223	5.40053	3.43924	4.50365	7.24868
Female_PGC#1	ENO2	1.44987	0.631554	0.218215	0.169774	3.73343
Female_PGC#1	EPB41L2	4.75329	3.50247	3.42023	3.76746	4.68323
Female_PGC#4	EPB41L3	0.267516	1.24925	0.596346	2.42682	0.115805
Female_PGC#2	EPB41L5	2.352	4.34524	2.72632	2.48083	1.65103
Female_PGC#1	EPHB4	1.67107	0.708829	0.32778	0.200326	1.55052
Female_PGC#4	EPHX1	0.274459	0.0914778	0.0359649	0.94414	2.34949
Female_PGC#3	EPM2AIP1	0.594173	0.633187	1.85109	1.13712	0.966457
Female_PGC#4	EPN1	0.449039	0.768086	1.20079	1.98735	2.72929
Female_PGC#3	EPS15	1.92657	2.77235	3.67962	2.96347	1.00951
Female_PGC#4	EPS8	0.467741	0.494538	1.31466	1.95678	0.0150033
Female_PGC#4	EPSTI1	0.381406	0.364666	0.358804	3.41249	0.415401
Female_PGC#1	ERBB3	1.38382	0.551736	0.151389	0.26064	1.17298
Female_PGC#4	ERBB4	0.0437232	0.0314374	0.155526	1.32348	0
Female_PGC#3	ERCC3	1.72956	2.65172	3.2187	2.02418	0.974732
Female_PGC#3	ERGIC3	4.29867	5.33784	6.07512	5.32234	4.13495
Female_PGC#4	ERICH5	0.339181	0.241089	0.702539	1.95171	0
Female_PGC#4	ERO1LB	0.452395	1.05633	1.349	2.75315	0.180199
Female_PGC#3	ERVK13-1	0.0946656	0.493408	1.35764	0.558912	0
Female_PGC#1	ESAM	1.11827	0.134915	0.121126	0.0453504	0.0595692
Female_PGC#3	ESCO2	1.71874	4.94894	5.91598	2.57849	0.800727
Female_PGC#4	ESRP1	1.89695	0.280566	1.28522	3.59075	2.32631
Female_PGC#2	ESX1	0.114674	1.74231	0.399688	0.364596	0.477437
Female_PGC#4	ETFA	1.6432	2.86734	3.1646	4.02823	1.77499
Female_PGC#1	ETFB	3.88689	3.48028	1.91468	2.73191	4.48608
Female_PGC#1	ETV1	1.24489	0.188135	0.0429851	0.00755704	0.530974
Female_PGC#1	ETV4	2.38092	0.163382	0.0371364	0.0389806	3.64648
Female_PGC#1	ETV5	3.6381	0.895541	0.887994	0.326966	3.3886
Female_PGC#4	EXOC3	0.48021	1.23917	1.51358	2.21783	0.42523
Female_PGC#1	EXOSC5	3.24423	2.5945	1.80855	2.36004	2.0083
Female_PGC#4	EYA2	0.107517	0.143889	0.0395882	1.66028	0
Female_PGC#4	EZR	3.9324	4.3295	5.57792	6.27973	5.01625
Female_PGC#4	F2	0.0367345	0.881607	0.230615	3.11636	0.0151769
Female_PGC#3	FAM105A	0.605378	1.8209	2.03305	1.59771	0.130704
Female_PGC#2	FAM114A1	0.901539	1.73115	0.501092	0.444103	0.779769
Female_PGC#1	FAM122C	2.4066	1.33037	1.32364	1.05945	2.01536
Female_PGC#1	FAM124B	0.933149	0.0708496	0	0.265152	0.405023
Female_PGC#2	FAM133A	0.470812	3.99857	3.37381	2.75007	0.042486
Female_PGC#3	FAM135A	0.775536	1.57507	2.22051	1.28623	0.672016
Female_PGC#4	FAM13A	0.702853	0.475968	0.442376	2.93899	0.986185
Female_PGC#4	FAM149A	0.046498	0.247218	0.422457	1.47038	0.0147003
Female_PGC#1	FAM162B	2.96226	1.2801	1.32058	0.145186	0.742864
Female_PGC#4	FAM167A-AS1	0.0284104	0.0258798	0.103976	4.18941	0
Female_PGC#4	FAM178B	0.218339	0.43101	0.437342	1.26403	0.0470459
Female_PGC#4	FAM195B	3.26287	4.75633	3.90907	5.24358	0.193239
Female_PGC#3	FAM204A	2.95769	4.78136	4.7879	4.43639	1.5284
Female_PGC#3	FAM208A	1.67832	2.73759	3.38563	2.15112	0.368544
Female_PGC#2	FAM213A	3.40427	4.63998	1.8552	3.35443	3.32639
Female_PGC#3	FAM214A	1.40769	2.33857	4.03736	2.44847	0.192556
Female_PGC#2	FAM216A	1.8386	3.81337	3.37937	2.06265	0.648536
Female_PGC#3	FAM217B	0.66439	1.03552	2.71815	1.13188	0.798201
Female_PGC#4	FAM227A	0.318728	1.21163	1.74278	3.22305	0.206498
Female_PGC#4	FAM227B	0.180903	1.26613	1.16477	2.14621	0.285133
Female_PGC#3	FAM228A	0.0827701	0.889152	2.78886	3.19444	0
Female_PGC#4	FAM228A	0.0827701	0.889152	2.78886	3.19444	0
Female_PGC#3	FAM228B	0.396773	1.26528	2.49723	1.66898	0.146677
Female_PGC#4	FAM35A	0.50373	1.23548	1.4626	2.22361	0.404315
Female_PGC#1	FAM46B	2.06791	0.342221	0.440171	1.5287	2.0869
Female_PGC#1	FAM63B	2.82748	2.20463	2.26617	2.52267	2.06525
Female_PGC#4	FAM71E1	0.878628	2.88975	2.43523	3.53027	0.694827
Female_PGC#3	FAM9C	0.549628	1.95172	4.32825	1.88792	0.0993743
Female_PGC#3	FANCI	1.49911	3.30063	3.44366	2.05062	0.729609
Female_PGC#3	FANCL	0.959041	1.80108	2.34002	1.51072	1.11851
Female_PGC#4	FARP1	0.712308	1.10261	0.4121	2.45947	1.93915
Female_PGC#1	FBL	4.53839	4.40711	2.58088	2.77088	4.6801
Female_PGC#1	FBLIM1	1.45431	0.109156	0.0837725	0.169849	2.52459
Female_PGC#1	FBLN1	2.94196	2.07054	0.971853	1.36778	4.37417
Female_PGC#4	FBLN7	0.0365595	0.007232	0.0676031	1.66668	0.0185947
Female_PGC#3	FBXL20	1.63876	1.91477	3.73471	2.20475	0.272794
Female_PGC#3	FBXL5	2.47908	3.75383	4.61908	3.52701	1.06098
Female_PGC#3	FBXO11	1.28766	1.88439	2.88944	1.42393	0.772236
Female_PGC#2	FBXO15	0.943102	2.98885	3.14957	1.49893	0.0317422
Female_PGC#3	FBXO15	0.943102	2.98885	3.14957	1.49893	0.0317422
Female_PGC#4	FBXO16	0.314809	0.412069	0.514495	1.95705	0.364154
Female_PGC#3	FBXO25	0.891687	3.34139	4.55064	3.19784	0.214702
Female_PGC#3	FBXO3	0.588219	2.46874	3.42684	3.27562	0.498162
Female_PGC#4	FBXO32	0.373022	0.248842	0.240304	1.56237	0.144747
Female_PGC#3	FBXO38	0.696719	1.02104	2.13699	1.30873	0.36948
Female_PGC#3	FBXO4	0.326385	1.38616	2.19341	1.05438	0
Female_PGC#3	FBXO43	0.307995	1.18782	2.49784	0.756583	0.0216635
Female_PGC#3	FBXO47	0.0635172	0.617475	2.33996	0.31139	0
Female_PGC#2	FBXO9	1.29848	2.97078	2.37402	1.86979	1.76371
Female_PGC#4	FBXW12	0.00643767	0.00557301	0.0549487	2.80149	0
Female_PGC#3	FBXW7	1.15278	2.34574	3.60502	2.42194	0.764994
Female_PGC#3	FCHO2	0.712211	0.902079	1.94154	1.10947	0.387389
Female_PGC#2	FDFT1	4.08222	5.20926	2.97397	4.02154	4.20426
Female_PGC#4	FDXR	1.00673	0.473009	0.56956	2.60409	0.765506
Female_PGC#4	FER1L4	0.012296	0.0525232	0.0639736	2.22397	0
Female_PGC#1	FGD4	1.74943	1.06158	0.59974	0.768981	0.681306
Female_PGC#4	FGFR1OP2	1.41711	2.34029	2.60558	3.40761	1.18167
Female_PGC#3	FH	2.089	4.31333	4.52088	4.21014	2.87556
Female_PGC#4	FHOD3	0.0918977	0.315429	0.690478	1.61117	0.0681337
Female_PGC#4	FIGLA	0.052044	0.140466	1.68873	5.041	0
Female_PGC#1	FKBP11	1.71949	0.369177	0.28623	0.0416441	0.76509
Female_PGC#3	FKBP2	3.24379	5.38991	5.73164	5.84792	3.68116
Female_PGC#4	FKBP2	3.24379	5.38991	5.73164	5.84792	3.68116
Female_PGC#3	FKBP6	0.277285	2.38705	3.23075	2.87866	0
Female_PGC#1	FLNA	3.53119	1.41452	0.459861	0.589678	3.57856
Female_PGC#1	FLNB	2.46851	1.23982	0.475925	1.80964	2.16346
Female_PGC#4	FLYWCH1	0.388751	0.329699	0.272061	2.02349	0.396617
Female_PGC#3	FLYWCH2	1.50119	3.35799	4.04135	2.59888	1.39352
Female_PGC#4	FMN1	0.5172	0.752848	1.02208	2.17674	0.0299661
Female_PGC#3	FMR1	1.78967	3.91545	4.26842	3.16334	0.316875
Female_PGC#1	FNDC5	1.63338	0.432068	0.103396	0.326598	0.918496
Female_PGC#4	FOLR1	0.18349	0.285324	0.0678128	2.34605	2.3029
Female_PGC#1	FOXN3	2.15287	1.01672	0.424789	1.15863	1.91345
Female_PGC#4	FOXO3	1.14091	1.48392	1.60531	2.64308	1.59303
Female_PGC#4	FOXR1	0.830458	3.00601	2.3686	3.72945	0
Female_PGC#3	FRA10AC1	2.70876	4.04505	4.67616	3.96691	1.66065
Female_PGC#1	FRAT2	1.17415	0.128873	0.230685	0.25402	1.69644
Female_PGC#4	FRMD3	0.268088	0.0671312	0.208146	3.31749	0.0216997
Female_PGC#1	FRMD6	1.4993	0.970897	0.852242	0.542199	2.14355
Female_PGC#3	FSD1L	0.767768	2.0726	2.51755	1.6493	0.183584
Female_PGC#1	FSTL1	2.85286	2.16495	0.601734	0.140329	3.13892
Female_PGC#4	FSTL4	0.0694565	0	0.0474553	1.40331	0.0627906
Female_PGC#3	FTCD	0.10997	0.91416	1.68294	3.88308	0.021576
Female_PGC#4	FTCD	0.10997	0.91416	1.68294	3.88308	0.021576
Female_PGC#4	FUCA2	1.1828	1.31282	1.29248	2.52611	1.09279
Female_PGC#3	FXR2	0.700855	1.2959	2.23991	1.1056	1.11828
Female_PGC#1	FXYD6	2.98423	0.658091	0.420969	0.11979	3.37575
Female_PGC#3	FZD3	1.11327	1.65888	2.8763	2.35095	0.795291
Female_PGC#4	G3BP2	2.57679	4.04661	3.43598	4.47782	2.52374
Female_PGC#1	GABARAPL1	1.98831	0.567994	0.431053	0.501931	2.07667
Female_PGC#4	GABARAPL2	3.92424	5.34177	5.32231	6.10168	3.78817
Female_PGC#4	GABBR2	0.0543963	0.0542585	0.065083	1.93709	0
Female_PGC#3	GABPB2	0.20636	0.619398	2.04972	0.773159	0.246789
Female_PGC#3	GABRB2	0.0962159	1.17008	1.65293	0.360971	0.0817945
Female_PGC#4	GADD45A	0.176562	1.18627	1.26755	1.91201	0.252138
Female_PGC#3	GALNS	0.221246	0.523731	1.42025	1.30646	0.584275
Female_PGC#4	GALNT13	0.106834	0.157958	0.151089	1.73609	0.100895
Female_PGC#1	GAS5	4.95052	2.91031	2.57105	2.3821	0
Female_PGC#1	GATSL2	1.77463	0.7699	0.358253	0.645965	0.0931135
Female_PGC#1	GCNT1	1.50232	0.483042	0.341226	0.309408	1.50597
Female_PGC#4	GCNT3	0.0179812	0.0188988	0.0620233	3.08722	0.0318876
Female_PGC#4	GDAP1	0.511619	0.674802	0.856166	2.86138	0.152553
Female_PGC#4	GDF9	0.0693478	0.149785	0.992083	4.80324	0
Female_PGC#1	GDPD2	1.41232	0.405944	0.0195225	0.0562073	0.0809831
Female_PGC#4	GGT6	0.00704847	0.0823858	0.0715059	1.45207	0
Female_PGC#3	GIGYF2	2.59501	3.5175	4.78035	3.69981	1.65149
Female_PGC#1	GIP	2.42205	0.925422	0.221534	0.34891	0.124348
Female_PGC#4	GIPC2	0.0749589	0.125113	0.9702	1.55302	0.016043
Female_PGC#3	GIT2	1.18993	1.75261	2.96918	2.3619	0.419572
Female_PGC#3	GKAP1	1.62636	2.09261	3.40152	3.19944	0.435592
Female_PGC#4	GLB1L2	0.0818115	0.276256	0.238714	1.01455	0
Female_PGC#3	GLCCI1	0.513578	2.21456	3.33478	2.50151	0.0510318
Female_PGC#1	GLDC	2.05107	0.631646	0.766128	0.240998	1.50805
Female_PGC#3	GLE1	0.742327	2.38183	2.99162	2.86664	0.502539
Female_PGC#1	GLIPR2	3.9258	1.00609	0.259796	0.609642	5.05786
Female_PGC#4	GLO1	1.87421	1.96835	1.28041	3.46643	4.27186
Female_PGC#4	GLRX	1.76207	1.41936	0.421636	6.14748	1.32147
Female_PGC#1	GLTSCR2	2.48679	1.34424	0.791613	1.27912	5.25035
Female_PGC#1	GLUD1	2.19548	1.00329	0.82094	1.09536	3.09082
Female_PGC#4	GLUL	2.61477	2.80462	2.80645	4.15052	1.67937
Female_PGC#3	GNAS	2.24068	3.59665	3.97003	5.80797	3.31552
Female_PGC#4	GNAS	2.24068	3.59665	3.97003	5.80797	3.31552
Female_PGC#1	GNB2L1	7.30612	5.76045	3.68479	5.30038	8.11032
Female_PGC#4	GNB4	1.17949	1.30028	0.761019	2.34177	1.25895
Female_PGC#4	GNG12	2.01171	2.22556	1.62223	4.09538	0.532451
Female_PGC#4	GNG4	0.112468	0.3086	0.379155	2.03314	1.31478
Female_PGC#4	GNG5	4.21494	4.58104	4.31122	5.50577	4.82719
Female_PGC#1	GNL3	4.0468	3.23483	2.52307	2.85028	2.74082
Female_PGC#3	GNPDA2	0.484334	1.72068	2.41392	2.95957	0.232143
Female_PGC#4	GNPDA2	0.484334	1.72068	2.41392	2.95957	0.232143
Female_PGC#3	GOLGA1	1.00829	1.94642	3.05703	2.77836	0.315078
Female_PGC#4	GOLGA2P5	0.0433696	0.503412	0.737288	2.59287	0
Female_PGC#3	GOLGA7	3.06133	4.41917	4.76682	3.78465	1.81305
Female_PGC#3	GPAA1	1.96627	2.739	3.78466	2.74348	3.27323
Female_PGC#3	GPAT2	0.46214	1.50565	2.47489	1.5684	0
Female_PGC#2	GPATCH11	2.37678	5.04861	3.79224	3.32425	0.362226
Female_PGC#1	GPATCH2	2.50091	1.61809	1.03243	1.87039	1.37876
Female_PGC#3	GPBP1	3.78942	4.60595	5.7439	4.84338	2.71967
Female_PGC#1	GPHA2	2.93506	0.539637	0.885453	1.09469	0.401472
Female_PGC#4	GPLD1	0.125837	0.408723	0.294368	1.36617	0.122021
Female_PGC#3	GPR89A	1.13863	1.71944	2.52817	1.77904	0.605542
Female_PGC#1	GPRC5C	1.56591	0.636564	0.298636	0.345416	1.89145
Female_PGC#4	GPX1	5.23102	5.06807	3.1426	6.56772	5.95802
Female_PGC#4	GPX3	0.942001	1.83344	0.909377	2.64268	1.23649
Female_PGC#2	GPX4	3.38763	5.19199	1.63468	1.78904	5.66624
Female_PGC#1	GRAMD1A	1.09118	0.3152	0.0508749	0.0660822	2.04962
Female_PGC#4	GRIK2	0.0120472	0.0244785	0.127384	1.47452	0
Female_PGC#1	GRWD1	2.25274	1.72783	0.879848	0.755549	1.38515
Female_PGC#3	GSAP	0.131605	0.221062	1.59376	1.57207	0.015807
Female_PGC#3	GSKIP	0.985649	1.47226	2.73648	2.60714	1.61884
Female_PGC#1	GSN	3.24441	1.37845	0.882363	0.593183	5.56418
Female_PGC#4	GSTK1	1.12268	1.59232	0.93775	2.58588	1.64997
Female_PGC#4	GSTM3	2.19182	2.41781	2.83394	4.48938	2.22122
Female_PGC#1	GSTM4	1.96551	0.565029	0.205298	0.700494	1.49147
Female_PGC#1	GSTP1	5.89689	5.3034	2.06734	2.20944	9.16702
Female_PGC#3	GTF2H1	1.44521	2.26287	3.06523	1.95391	0.91148
Female_PGC#1	GTF2IRD2	1.23315	0.403046	0.353998	0.540201	0.0579225
Female_PGC#3	GTF3C3	2.1888	3.69048	4.53132	3.52043	1.15475
Female_PGC#4	GYG1	2.74436	4.00158	3.51358	4.81522	1.79489
Female_PGC#4	HABP2	0.0034404	0.00479972	0.00268768	1.31251	0
Female_PGC#2	HAGH	1.53194	3.52051	2.55843	3.20672	2.85873
Female_PGC#4	HAP1	0.088064	0.155898	0.211171	1.51998	0.0239416
Female_PGC#2	HBQ1	0.333219	2.19827	1.42611	1.43108	0.188515
Female_PGC#3	HDAC2	4.43656	5.40411	5.84574	5.04391	4.58151
Female_PGC#3	HDAC6	1.84604	2.56523	3.69823	1.25689	0.97222
Female_PGC#3	HDGFRP3	1.96207	3.98205	3.82637	2.17443	1.39645
Female_PGC#3	HERC5	4.32608	6.66511	7.06181	5.05074	1.24973
Female_PGC#4	HERC6	0.258197	0.108579	0.215941	2.15313	0.348856
Female_PGC#4	HERPUD1	1.37038	1.16904	2.44881	3.22655	1.73863
Female_PGC#3	HESX1	0.219512	0.513391	2.57019	0.344662	0.0230502
Female_PGC#4	HEY2	0.305745	0.418623	0.81063	2.8637	0.587718
Female_PGC#3	HFM1	0.516216	1.60804	3.89745	1.82457	0.0382498
Female_PGC#1	HIAT1	2.4538	1.03727	1.18317	2.38387	1.7169
Female_PGC#4	HID1	0.0658436	0.111605	0.218459	1.47892	0.454535
Female_PGC#3	HIGD1A	3.58024	5.22257	5.92526	4.16625	3.34059
Female_PGC#1	HILPDA	3.07283	1.35827	1.14113	1.74118	1.81446
Female_PGC#3	HINFP	1.27375	2.02063	3.11664	1.28697	0.866515
Female_PGC#2	HINT2	2.52718	4.37441	2.58899	3.55223	3.03783
Female_PGC#3	HINT3	1.19103	1.69674	3.62894	1.82567	0.788124
Female_PGC#4	HIP1R	0.508936	0.92141	1.1448	1.85416	0.600965
Female_PGC#3	HIPK1	0.939415	1.85759	2.88761	2.11657	0.317458
Female_PGC#4	HIPK4	0.00772069	0.00161056	0.0152254	1.90122	0
Female_PGC#3	HIST1H2AA	0.598132	1.66521	3.7999	3.26713	0
Female_PGC#1	HK1	2.18313	1.17921	0.58398	0.283832	3.21609
Female_PGC#1	HLA-E	2.2579	0.835416	0.508295	0.375311	3.15302
Female_PGC#3	HLTF	3.87169	5.1123	5.96718	3.1805	0.822701
Female_PGC#2	HMGB1	6.77645	8.08679	7.38534	7.1457	6.15573
Female_PGC#1	HMGN1	4.97497	3.39191	3.28809	3.27319	6.10131
Female_PGC#2	HMGN2	6.21017	7.1869	6.31415	6.06555	5.01438
Female_PGC#4	HMHA1	0.299547	0.255722	0.8472	2.06806	0.162661
Female_PGC#3	HMOX2	3.11381	4.60648	4.9027	4.16724	2.37901
Female_PGC#1	HNRNPA1	5.50571	3.67349	2.10039	3.82109	7.62124
Female_PGC#4	HNRNPA1L2	0.500845	0.810634	0.903097	2.30946	1.61178
Female_PGC#1	HNRNPF	4.93349	3.91973	3.36166	4.32794	5.00954
Female_PGC#4	HOMER2	0.255033	0.329467	0.256003	1.42262	1.11951
Female_PGC#3	HOOK1	0.620767	1.75985	3.05436	3.10968	0.46627
Female_PGC#4	HOOK1	0.620767	1.75985	3.05436	3.10968	0.46627
Female_PGC#3	HORMAD1	0.962401	3.52788	5.21895	2.74901	0.0379752
Female_PGC#3	HORMAD2	0.0202221	0.400974	2.66645	0.19708	0
Female_PGC#2	HOXA3	0.104381	1.43213	0.962903	0.672418	0
Female_PGC#2	HOXA5	0.0393351	1.77797	0.852133	0.196371	0
Female_PGC#2	HOXB5	0.371322	2.80031	0.880781	0.211516	0.0281211
Female_PGC#2	HOXB7	0.743864	2.69501	1.45876	1.7557	0.0487767
Female_PGC#3	HOXC9	0.246656	2.11614	2.3429	2.36365	0
Female_PGC#3	HOXD1	0.0832945	0.508838	2.06698	1.90191	0.724027
Female_PGC#3	HOXD8	0.366368	0.687174	1.87111	1.5357	0
Female_PGC#3	HPRT1	2.29333	4.59741	5.70588	3.26832	1.38705
Female_PGC#4	HPS4	1.22032	1.51078	2.2463	2.77909	0.813589
Female_PGC#4	HRAT56	0.0128735	0.00974722	0.174915	2.58697	0
Female_PGC#1	HRSP12	2.03446	1.50925	0.417684	0.607743	1.10046
Female_PGC#3	HSF2	1.69723	4.49753	5.10975	3.83906	1.12635
Female_PGC#3	HSF2BP	0.321885	2.1802	4.08334	2.72113	0.0394763
Female_PGC#3	HSPA2	0.378134	0.906697	2.34443	2.84884	0.45435
Female_PGC#4	HSPA2	0.378134	0.906697	2.34443	2.84884	0.45435
Female_PGC#3	HSPA4L	0.887708	2.17176	3.16592	3.03519	0.0614608
Female_PGC#3	HSPB11	2.35353	3.84394	4.43163	3.85085	2.45576
Female_PGC#2	HTATSF1	3.1304	5.08263	4.22502	4.12545	2.37336
Female_PGC#1	HUS1	2.16153	0.960505	0.760422	0.853379	1.63694
Female_PGC#3	HYDIN	0.247971	0.743893	1.66259	0.849599	0.0148822
Female_PGC#3	HYLS1	0.929003	1.75047	2.80796	2.00917	0.618428
Female_PGC#4	IAH1	1.29941	2.57029	2.09544	3.62697	1.04945
Female_PGC#4	ID2	1.49491	3.20669	3.15536	3.62242	2.24936
Female_PGC#2	IDH3A	1.6714	3.40687	2.93184	2.61813	0.862127
Female_PGC#1	IFI16	4.92517	4.3521	0.676634	0.226945	3.6937
Female_PGC#4	IFI27L1	1.66221	2.72616	2.27091	3.90019	1.76645
Female_PGC#1	IFITM1	4.61394	1.22144	0.418834	0.546032	1.89414
Female_PGC#1	IFITM3	3.68099	1.84689	1.13876	0.174872	5.10576
Female_PGC#3	IFT122	1.19953	2.551	3.36875	1.47353	0.437277
Female_PGC#3	IFT57	1.77998	4.30434	4.65466	4.11837	1.00766
Female_PGC#3	IFT81	1.34142	3.57804	5.04372	2.30908	0.548708
Female_PGC#3	IFT88	1.13076	2.60689	3.99617	2.74392	0.433441
Female_PGC#4	IGF2BP3	1.06407	2.1793	2.21319	4.39518	2.3298
Female_PGC#1	IGFBP6	2.08392	1.08099	0.740986	1.31791	0.309595
Female_PGC#2	IKZF5	1.23351	3.15031	2.24589	1.89973	0.117497
Female_PGC#3	IL13RA1	0.598131	1.11297	1.60566	1.74834	0.394599
Female_PGC#3	IL13RA2	0.108209	0.178421	2.16362	0.555853	0.129911
Female_PGC#2	IL17RD	0.375091	1.5981	1.06406	0.635555	1.46076
Female_PGC#1	IL4R	1.11233	0.245756	0.00335875	0.50149	0.919439
Female_PGC#1	IL6R	1.74699	0.619131	0.0970822	0.0780179	1.77082
Female_PGC#3	ILKAP	1.71165	2.94023	3.49998	2.33179	1.8693
Female_PGC#1	IMP3	3.47749	2.49026	1.38354	2.1546	3.61723
Female_PGC#1	IMP4	2.79381	2.3231	1.03829	1.70484	2.69852
Female_PGC#3	IMPACT	1.99167	3.98864	4.05868	3.01518	0.801815
Female_PGC#4	IMPDH1	0.74755	1.66947	1.47046	3.13988	0.460978
Female_PGC#3	INCA1	0.484205	2.79884	5.23276	2.16895	0.291936
Female_PGC#4	INPP4B	0.129487	0.00631477	0.0337518	1.0162	0
Female_PGC#4	INSC	0.0118291	0.0204465	0.0566786	1.82085	0
Female_PGC#3	INTS6	0.738189	2.446	3.2605	2.77788	0.863277
Female_PGC#3	IQCB1	1.19528	3.2348	5.38186	2.96944	0.509743
Female_PGC#3	IQCG	0.978657	1.887	2.79772	2.18513	0.32713
Female_PGC#4	IQSEC1	0.40113	0.196286	0.542378	1.90768	0.318221
Female_PGC#4	IQUB	0.298076	0.997846	2.11586	2.79482	0.0392657
Female_PGC#4	ISPD	0.176876	0.261051	0.353642	1.93422	0.651847
Female_PGC#3	IST1	3.58133	4.12154	4.82998	3.12762	1.66783
Female_PGC#1	ITFG3	3.17838	2.47856	2.07177	2.71687	1.9672
Female_PGC#3	ITGB3BP	2.55527	3.64867	4.47247	2.56059	1.9418
Female_PGC#4	ITGB5	0.36925	1.16411	1.4674	2.00201	0.565035
Female_PGC#4	ITGBL1	0.0710632	0.118177	0.137537	1.90364	0
Female_PGC#4	ITIH2	0.00476022	0.0317736	0.103535	2.38704	0
Female_PGC#1	ITM2C	4.07902	1.30796	1.01536	1.27918	5.19208
Female_PGC#4	ITPR1	0.577948	0.720657	0.394522	2.36596	0.29721
Female_PGC#3	ITSN2	2.34031	3.09802	4.40183	3.91707	1.06068
Female_PGC#1	JADE2	1.02539	0.309209	0.0795322	0.0351129	0.544553
Female_PGC#3	JADE3	0.353981	2.36359	3.46385	1.7229	0.113195
Female_PGC#4	JAG1	0.363536	0.178634	0.138298	3.21251	0.276624
Female_PGC#2	JAK1	3.14016	4.86109	3.37708	3.49676	1.59322
Female_PGC#4	JARID2	2.31775	2.01565	1.80778	5.19419	1.26835
Female_PGC#4	JAZF1	0.617804	0.98473	1.36943	3.9629	0.211294
Female_PGC#3	JMJD1C	3.53174	3.69371	4.89695	3.77239	2.41463
Female_PGC#4	JPH2	0.0208676	0.0383541	0.1265	2.50613	0
Female_PGC#1	JUP	2.32148	0.98344	0.27757	0.983418	2.5451
Female_PGC#4	KCCAT333	0.00246847	0.0162129	0.0706385	2.12893	0
Female_PGC#4	KCNK9	0.0155079	0.00322204	0.0314106	1.59112	0.0323113
Female_PGC#2	KDM1B	0.679543	2.13221	0.629163	2.21573	0.203477
Female_PGC#4	KDM1B	0.679543	2.13221	0.629163	2.21573	0.203477
Female_PGC#3	KDM2A	1.61187	1.71592	3.60126	2.75655	0.868781
Female_PGC#3	KDM5B	3.5189	4.92994	5.72412	4.08937	4.15385
Female_PGC#3	KDM6A	1.40379	2.10004	3.57273	2.26067	0.629737
Female_PGC#3	KHDC1	0.440289	1.0747	2.51396	0.666103	0.126422
Female_PGC#1	KHDC3L	2.92549	0.441088	0.146608	0.988279	0
Female_PGC#1	KIAA0226	2.03141	1.11837	1.1714	1.30121	0.159114
Female_PGC#4	KIAA0430	1.26114	1.311	1.45425	2.64379	0.274106
Female_PGC#4	KIAA0930	0.532418	0.83373	0.288052	2.08183	0.357928
Female_PGC#4	KIAA1024	0.0197979	0.0591982	0.0268632	0.89187	0
Female_PGC#4	KIAA1147	0.143148	0.32424	0.61002	1.79983	0.0380735
Female_PGC#4	KIAA1549L	0.0569845	0.0149987	0.0568836	1.92631	0.010307
Female_PGC#3	KIAA1586	1.1486	1.35606	2.83689	1.49163	1.16733
Female_PGC#3	KIAA1715	1.29522	3.19754	3.6554	2.91916	0.549104
Female_PGC#4	KIF13B	0.459437	1.22651	1.07405	2.6379	0.0755304
Female_PGC#3	KIF18A	0.976004	2.44486	3.2256	1.44071	0.56442
Female_PGC#3	KIF1A	0.389165	0.099282	2.10716	0.852185	0.1422
Female_PGC#3	KIF20B	2.48634	3.94283	4.58308	3.88424	2.30578
Female_PGC#3	KIF21A	1.41056	0.771023	3.52589	0.594473	1.11779
Female_PGC#3	KIF5B	4.24338	3.78649	5.62347	5.11593	5.57589
Female_PGC#3	KIFAP3	2.20923	3.97099	4.53106	4.10761	0.812751
Female_PGC#1	KIT	3.14479	3.02925	0.83176	3.23619	0.341715
Female_PGC#2	KLC1	1.57053	3.65777	3.72794	3.18583	1.68552
Female_PGC#1	KLF4	1.98982	0.402256	0.453898	1.50627	3.87958
Female_PGC#4	KLF5	1.02422	1.81589	1.71284	3.69292	0.339071
Female_PGC#3	KLHL20	0.942537	1.81775	3.03758	2.31804	0.426428
Female_PGC#2	KLHL35	1.23602	4.15194	1.45441	2.46209	0.139305
Female_PGC#4	KLHL7	1.57731	0.993248	2.67335	3.92068	1.08374
Female_PGC#3	KLHL8	0.660393	1.22807	2.62512	1.91894	0.227894
Female_PGC#1	KLRG2	0.900326	0.0777076	0.0351754	0.0168508	1.44428
Female_PGC#3	KMT2E	3.39823	3.91944	4.80143	4.89167	2.62589
Female_PGC#4	KMT2E	3.39823	3.91944	4.80143	4.89167	2.62589
Female_PGC#4	KPNA7	0.0364778	0.0503577	0.139743	4.75265	0
Female_PGC#3	KRBOX1	0.822064	1.86914	3.03716	3.1027	0
Female_PGC#2	KRCC1	0.697786	2.68322	2.59169	1.20963	1.28648
Female_PGC#3	KRCC1	0.697786	2.68322	2.59169	1.20963	1.28648
Female_PGC#3	KRIT1	2.02611	3.74205	4.31292	2.95336	1.28874
Female_PGC#2	KRT17P5	0.420251	1.84204	0.73006	0.759189	0
Female_PGC#4	KRT19	0.246311	0.879043	0.983237	3.36873	3.47706
Female_PGC#1	L1TD1	4.39258	2.95757	0.254459	1.59124	6.02503
Female_PGC#3	LACC1	0.214059	1.33159	3.23566	2.40717	0.0158582
Female_PGC#4	LAD1	0.153325	0.00433081	0.217842	2.94971	2.03609
Female_PGC#3	LAMTOR3	2.84835	3.43499	4.17535	2.8273	1.02938
Female_PGC#1	LAPTM4A	6.28071	5.34025	5.03993	5.18806	7.34795
Female_PGC#1	LAPTM4B	3.73298	3.43624	1.64981	3.02933	4.50158
Female_PGC#1	LASP1	1.71647	0.601437	0.175529	0.43112	1.70131
Female_PGC#2	LBR	2.52493	3.85207	1.92974	1.46331	1.6852
Female_PGC#3	LCA5L	0.372129	0.906776	3.31247	1.13043	0.0783711
Female_PGC#4	LCMT1	2.65432	3.59118	3.07816	4.45072	3.03407
Female_PGC#3	LCOR	1.50646	2.49704	3.23162	3.14541	0.717401
Female_PGC#1	LCP1	1.53298	0.129758	0.045132	0.0545159	1.73546
Female_PGC#1	LDHA	5.74911	5.69354	3.36647	4.10021	6.43494
Female_PGC#4	LDHAL6A	0.190877	0.812046	1.62536	5.2426	0
Female_PGC#1	LDHB	6.40092	5.27407	4.29077	3.62706	6.15029
Female_PGC#3	LDHC	0.284147	0.846048	2.69894	1.55774	0.0794813
Female_PGC#1	LDLRAP1	1.89766	1.09621	0.500012	1.47607	2.2093
Female_PGC#1	LDOC1	2.42373	1.3646	0.640726	2.01437	2.04854
Female_PGC#1	LGALS1	5.1636	1.7978	1.00673	3.1879	5.58872
Female_PGC#4	LGALS3	0.641807	0.515418	0.585446	1.97455	1.58061
Female_PGC#4	LHB	0.0513954	0.100319	0.655365	2.08072	0.00820559
Female_PGC#3	LHX8	0.00990474	0.369291	1.7984	2.79334	0
Female_PGC#4	LHX8	0.00990474	0.369291	1.7984	2.79334	0
Female_PGC#4	LIMS2	0.0873741	0.0338151	0.162421	1.78682	0.0938258
Female_PGC#1	LIN28A	1.71596	0.391058	0.159915	0.27418	2.86355
Female_PGC#3	LIN7B	1.06526	3.65774	3.8758	3.51169	0.864272
Female_PGC#3	LINC00467	1.77372	3.51166	4.54228	3.14584	0
Female_PGC#4	LINC00491	0.100528	0.219607	0.598195	1.90732	0.0727935
Female_PGC#4	LINC00707	0.0137016	0.00322849	0	1.52435	0.0362204
Female_PGC#3	LINC00933	0.0350365	0.289006	1.28095	0.694934	0
Female_PGC#4	LINC00937	0.153388	0.162296	0.204257	1.3984	1.1936
Female_PGC#3	LINC01024	0.218721	0.275059	1.68094	0.364809	0.12063
Female_PGC#4	LINC01030	0.0902487	0.306791	0.752175	1.66626	0.0248158
Female_PGC#4	LINC01057	0.142253	0.227605	0.11853	1.09874	0.0496977
Female_PGC#4	LINC01118	0.00691673	0.0129467	0	2.20528	0
Female_PGC#4	LINC01128	0.706507	1.45059	1.47159	2.26507	0
Female_PGC#4	LINC01257	0.00971297	0.0267032	0.057714	1.17332	0
Female_PGC#4	LINC01291	0.000604709	0.0175609	0.135244	2.40404	0
Female_PGC#4	LINC01511	0.142432	0.149393	0.421903	2.24959	0
Female_PGC#4	LINC01554	0.0638704	0.222564	0.502054	1.92427	0
Female_PGC#1	LITAF	2.42703	0.79476	0.493513	0.816598	3.24214
Female_PGC#4	LMO3	0.0586543	0.183886	0.253997	2.4042	0.0101404
Female_PGC#4	LMO7	0.490577	1.59216	2.39434	3.85949	0.138332
Female_PGC#4	LMOD3	0.017451	0	0.0558028	2.29738	0.0185819
Female_PGC#3	LOC100129434	2.47031	2.65097	3.6688	3.24105	0
Female_PGC#3	LOC100130987	0.0281536	0.203578	1.21405	1.36955	0
Female_PGC#3	LOC100421746	0.0819152	0.959166	1.70045	0.916011	0
Female_PGC#4	LOC100505915	0.0610032	0.0381478	0.142655	0.957795	0
Female_PGC#3	LOC100505984	0.0726247	0.497364	1.91793	0.101204	0
Female_PGC#4	LOC100506746	0.118792	0.0512318	0.090355	0.917006	0
Female_PGC#3	LOC100506844	1.12122	2.69944	4.43419	2.92363	0
Female_PGC#4	LOC100506990	0.289797	0.146504	0.377249	1.16224	0
Female_PGC#3	LOC100507250	0.184852	0.370589	1.68816	1.10588	0
Female_PGC#3	LOC101927100	0.278212	0.706642	1.6883	0.465141	0
Female_PGC#4	LOC101927701	0.000948493	0	0.0373259	1.46924	0
Female_PGC#4	LOC101927845	0.00683241	0	0.00400425	1.3941	0
Female_PGC#1	LOC101928103	1.17525	0.332495	0.27527	0.064116	0
Female_PGC#3	LOC101928222	0.0620274	0.610381	1.311	0.6195	0
Female_PGC#3	LOC101928226	0.0568697	0.969598	2.31916	2.47395	0
Female_PGC#4	LOC101928226	0.0568697	0.969598	2.31916	2.47395	0
Female_PGC#4	LOC101928823	0.0125495	0.00453337	0.0122882	1.64815	0
Female_PGC#4	LOC101929128	0.439503	2.36894	1.94632	3.68371	0
Female_PGC#4	LOC101929524	0.018319	0.0963407	0.11892	4.45461	0
Female_PGC#3	LOC102724601	0.0483469	0.134027	1.53936	0.279496	0
Female_PGC#4	LOC105377348	0.341817	0.361001	0.974218	2.08594	0
Female_PGC#4	LOC283683	0.609122	1.43567	1.71871	2.6269	0
Female_PGC#4	LOC284294	0.00320847	0	0.0398352	1.42553	0
Female_PGC#4	LOC339166	0.0327982	0.113048	0.20496	0.903691	0
Female_PGC#4	LOC339874	0.0658569	0.069649	0.213929	1.23293	0
Female_PGC#3	LOC400684	0.17768	0.438035	1.5402	1.00387	0
Female_PGC#2	LOC441601	0.528851	2.5164	1.89706	2.30347	0
Female_PGC#3	LOC643201	0.116004	0.436651	1.42354	0.859778	0
Female_PGC#4	LOC643623	0.00870892	0	0.0184543	1.34193	0
Female_PGC#4	LOC652276	1.13457	1.55318	1.30205	3.58644	0
Female_PGC#4	LOC654342	0.927545	1.51824	2.1996	2.91603	0
Female_PGC#3	LOC81691	0.766743	3.573	5.25735	3.02748	0
Female_PGC#4	LONP1	2.54275	2.25354	1.3124	3.95778	1.08523
Female_PGC#4	LOXL2	2.14898	0.743052	0.217739	3.8347	0.245074
Female_PGC#1	LPAR2	1.00447	0.596426	0.0862922	0.069839	0.883309
Female_PGC#1	LPIN1	2.65757	0.908046	0.99267	1.08299	1.18201
Female_PGC#4	LPPR1	0.0416597	0.225465	0.0624313	1.43497	0.00570628
Female_PGC#3	LRCH2	0.191484	1.04855	2.1001	0.81255	0.803914
Female_PGC#3	LRPAP1	3.86524	4.38608	5.55829	5.51199	4.2512
Female_PGC#4	LRRC17	0.525782	0.244668	0.236168	2.23955	0.0088548
Female_PGC#3	LRRC34	0.158933	1.08415	2.07538	1.1861	0.0708059
Female_PGC#3	LRRC40	1.47045	2.53969	3.51246	3.65463	0.650558
Female_PGC#4	LRRC40	1.47045	2.53969	3.51246	3.65463	0.650558
Female_PGC#3	LRRC41	1.10149	1.71785	2.41263	1.44724	1.66485
Female_PGC#3	LRRC49	0.539225	2.01704	2.87239	1.39436	0.407244
Female_PGC#3	LRRFIP2	1.49762	2.47423	3.318	3.35577	1.46012
Female_PGC#3	LRRIQ3	0.338519	1.04934	2.08563	0.6813	0.0130524
Female_PGC#4	LRRK1	0.159209	0.388786	0.415731	1.7315	0
Female_PGC#4	LRWD1	1.03536	1.06147	0.829299	2.46376	1.43897
Female_PGC#4	LSM10	2.07183	1.99413	1.29797	3.72233	2.37367
Female_PGC#3	LSS	0.519889	1.10409	1.9225	1.5145	0.357416
Female_PGC#2	LUZP4	2.19067	4.61153	2.47631	1.6977	0.00691257
Female_PGC#1	LY6E	4.47505	3.15997	1.11282	1.84007	5.02711
Female_PGC#2	LY6G5C	0.155471	2.18142	1.62784	1.47452	0.0769392
Female_PGC#3	LYPD4	0.00704902	0.0996366	1.20313	0.598005	0
Female_PGC#3	LYRM1	1.36725	1.88219	3.3911	2.13649	0.417137
Female_PGC#4	LYRM5	0.429345	0.728746	0.985806	1.69144	0.753696
Female_PGC#3	LYRM9	0.704063	1.62479	3.03884	3.00119	0.450327
Female_PGC#3	LYST	0.674104	1.97923	3.86597	2.21324	0.5965
Female_PGC#3	LZIC	1.5419	3.27466	3.88858	3.1729	1.16256
Female_PGC#3	MACF1	2.46193	2.69657	4.32764	2.86189	1.69393
Female_PGC#3	MAD2L1	1.93593	4.71999	4.96575	3.25928	2.60268
Female_PGC#3	MAEL	1.96066	4.6511	5.11723	5.34521	0
Female_PGC#4	MAEL	1.96066	4.6511	5.11723	5.34521	0
Female_PGC#3	MAGEB3	0.071891	0.636585	1.89648	0.313676	0
Female_PGC#1	MAGED1	3.24101	1.48986	1.09015	1.09028	2.58254
Female_PGC#4	MAL2	0.155537	0.561874	1.18927	2.51249	0.19881
Female_PGC#3	MALAT1	8.52247	9.57715	10.2403	8.88702	9.32397
Female_PGC#4	MAN1A1	0.287077	0.440939	0.590938	1.76542	0.142596
Female_PGC#4	MAP1B	1.76086	0.921384	0.586369	3.92002	4.4752
Female_PGC#4	MAP1LC3A	1.64222	1.47564	1.77313	3.73298	2.80898
Female_PGC#2	MAP1LC3B	3.81173	5.65701	5.02513	4.92142	3.50556
Female_PGC#3	MAP3K2	1.65687	2.77689	3.27249	3.11969	0.339635
Female_PGC#4	MAP7	0.301782	1.00559	2.05786	2.63282	0.667956
Female_PGC#2	MAP7D3	2.41062	4.91477	3.74959	3.89085	1.21804
Female_PGC#4	MAPK13	0.205123	0.170311	0.189934	1.24737	0.372456
Female_PGC#4	MAPT	0.0913038	0.208072	0.156006	1.45793	0.280911
Female_PGC#1	MARCKSL1	3.33033	2.58733	1.19732	1.46819	6.69469
Female_PGC#4	MAST4	0.632772	0.669366	1.0487	2.23637	0.380603
Female_PGC#4	MAT2B	2.86648	3.36978	3.04713	5.87356	1.23152
Female_PGC#4	MB21D2	0.427836	0.345413	0.560621	1.7514	1.04318
Female_PGC#3	MBD1	0.839055	1.13954	2.40326	1.53796	0.571892
Female_PGC#3	MBIP	1.32127	2.10187	3.63454	3.86116	1.3754
Female_PGC#4	MBIP	1.32127	2.10187	3.63454	3.86116	1.3754
Female_PGC#3	MBOAT2	0.352554	1.34006	1.78202	1.03615	1.32499
Female_PGC#3	MCMDC2	0.247097	1.37272	2.42618	0.660732	0
Female_PGC#4	MCTP1	0.187732	0.240717	0.23184	2.23367	0
Female_PGC#4	MCTP2	0.2215	0.0174471	0.029751	1.10927	0.00737527
Female_PGC#1	MCTS1	3.78768	2.72677	2.36083	3.4694	2.96767
Female_PGC#1	MDH1	5.13757	4.76994	3.65888	4.52579	4.26698
Female_PGC#2	MDK	5.0649	6.68555	5.61753	4.0217	6.37956
Female_PGC#3	ME2	1.41096	1.69047	2.77327	2.23554	0.593488
Female_PGC#3	MED14	0.701011	0.929018	2.94968	1.66588	0.351327
Female_PGC#4	MED16	1.65179	2.05881	1.74424	4.95068	0.7528
Female_PGC#3	MED31	0.514604	1.23316	1.93744	0.961471	1.45802
Female_PGC#3	MED7	1.63951	2.66643	3.58752	2.94822	1.2721
Female_PGC#4	MED8	1.77392	2.56871	2.87108	3.75098	1.14196
Female_PGC#3	MEF2A	1.63588	2.03206	3.2356	2.73404	1.06133
Female_PGC#1	MEG3	5.41949	2.7143	1.93005	1.59246	0.190736
Female_PGC#4	MEGF11	0.0280046	0.0586386	0.0759047	1.7326	0.0437461
Female_PGC#3	MEI1	0.204421	2.16918	3.23721	1.2999	0
Female_PGC#3	MEIKIN	0.134612	1.09858	4.18436	2.8105	0
Female_PGC#3	MEIOB	0.460619	0.877962	3.79068	1.12322	0.284491
Female_PGC#2	MEIS1	0.437366	2.28145	0.820484	0.599071	0
Female_PGC#2	MEIS2	0.317117	3.12092	1.27486	0.294278	0.0975253
Female_PGC#3	METAP2	3.96355	5.15721	5.72374	5.03456	3.33812
Female_PGC#4	MFAP3L	0.286207	0.41701	0.702101	1.69048	0.150572
Female_PGC#4	MFN1	0.533342	1.1017	2.01118	2.41622	0.493004
Female_PGC#3	MFN2	0.725441	1.03838	2.66239	2.44781	0.379678
Female_PGC#1	MGAT5	1.6826	0.746882	0.217051	1.21938	0.490964
Female_PGC#4	MGC72080	0.260086	0.676461	0.670472	1.79039	0
Female_PGC#2	MGMT	2.1187	3.61251	1.65086	2.99769	2.70518
Female_PGC#1	MGST3	5.37832	2.74927	1.74599	2.9538	5.30517
Female_PGC#4	MICAL2	0.268879	0.0730288	0.0796742	1.99486	0
Female_PGC#4	MIER1	2.45054	3.47456	2.8988	4.14574	2.20692
Female_PGC#4	MKKS	3.73001	4.23781	4.69456	5.47229	2.76204
Female_PGC#4	MKNK2	0.744457	2.05796	1.84365	2.7476	0.771165
Female_PGC#1	MKRN1	4.10633	2.14073	1.45101	2.16388	5.29617
Female_PGC#1	MLEC	4.41917	3.19858	2.46196	2.38346	5.01892
Female_PGC#3	MLF1	2.27311	4.91989	5.45828	4.39251	1.59142
Female_PGC#4	MLK7-AS1	0.255985	0.769278	0.444875	1.43092	0
Female_PGC#4	MLLT3	0.614933	1.68755	1.43796	2.50882	0.200703
Female_PGC#1	MMP2	3.35382	0.607179	0.101935	0.206824	4.70219
Female_PGC#3	MORC1	0.202468	1.28846	2.2416	1.38725	0
Female_PGC#3	MORN2	1.46397	2.99618	4.2097	3.65875	0.690802
Female_PGC#4	MOV10	1.93005	0.643467	1.30964	3.49509	1.59674
Female_PGC#3	MOV10L1	0.346848	1.99886	2.75245	1.7935	0
Female_PGC#4	MPP7	0.0900378	0.395543	0.675592	1.42005	0
Female_PGC#1	MRPL11	3.01086	1.97342	2.11074	1.21848	3.96932
Female_PGC#1	MRPL15	3.82093	3.29027	1.98699	3.30962	3.99163
Female_PGC#1	MRPL17	3.09342	1.70744	1.70699	1.9944	2.82682
Female_PGC#1	MRPL34	3.2971	3.0176	1.23363	2.31376	3.05644
Female_PGC#1	MRPL49	1.60818	0.974039	0.393616	0.631688	1.69483
Female_PGC#1	MRPL57	4.39408	3.63158	2.08735	3.54234	0
Female_PGC#1	MRPL9	3.01772	2.15523	2.00884	1.8177	2.86772
Female_PGC#1	MRPS18B	4.07556	3.03355	1.93394	2.6727	3.27096
Female_PGC#1	MRPS2	1.93415	1.33772	0.494388	1.51182	2.60191
Female_PGC#1	MRPS7	3.54513	2.96252	1.9924	3.3389	3.88613
Female_PGC#1	MRS2	2.42074	1.9657	1.34528	1.76475	1.96695
Female_PGC#4	MRVI1-AS1	0.0974517	0.504562	1.07159	3.01744	0.174917
Female_PGC#3	MSL1	0.713859	2.30754	3.25499	1.33919	0.229136
Female_PGC#3	MSL3	1.76999	2.33939	3.64393	3.3593	0.512379
Female_PGC#3	MTDH	2.41457	3.20257	3.73797	3.32652	3.39877
Female_PGC#1	MTHFD1	2.6716	1.59056	0.551324	1.33686	2.40936
Female_PGC#3	MTL5	0.218985	0.15269	1.98224	1.91325	0.964469
Female_PGC#3	MTMR6	0.861635	1.92731	2.89315	2.36005	0.603726
Female_PGC#2	MTRNR2L8	1.21022	2.16641	1.56915	1.62803	0.241269
Female_PGC#4	MTUS1	1.42145	1.09703	1.49694	2.98196	0.0154848
Female_PGC#3	MTX2	3.36473	4.77613	5.07941	3.51122	2.59279
Female_PGC#4	MUC20	0.0468884	0.073358	0.160144	2.58344	0.0184911
Female_PGC#3	MUM1	1.30353	2.80098	3.4189	2.63654	1.50908
Female_PGC#4	MVP	1.20663	0.248649	0.32016	3.75459	0.168251
Female_PGC#1	MYADM	1.76175	0.862536	0.259258	0.607846	2.0839
Female_PGC#1	MYBL2	2.952	2.95599	1.60573	2.36534	4.39156
Female_PGC#4	MYCBP2	1.81071	2.55854	2.7124	3.79513	1.1159
Female_PGC#3	MYCBPAP	0.0338294	0.0297364	1.21752	0.242573	0.023236
Female_PGC#1	MYCN	1.05743	0.379149	0.0589657	0.0502259	0.450653
Female_PGC#3	MYDGF	3.31317	3.78912	4.70211	4.43684	0
Female_PGC#3	MYEF2	0.268772	1.29704	1.61039	0.976128	0.232995
Female_PGC#4	MYH15	0.0656543	0.0508261	0.317184	2.57821	0
Female_PGC#1	MYL6	7.07428	5.63956	2.51609	4.45072	8.51696
Female_PGC#4	MYO1E	0.920738	0.732445	0.547404	2.29279	0.811103
Female_PGC#4	MYO5B	0.259364	0.45696	1.14039	3.16714	0.0267276
Female_PGC#4	MYO7B	0.0258718	0.0366423	0.372028	3.07716	0
Female_PGC#3	N4BP2L2	3.04466	3.25639	4.44123	3.46586	2.95129
Female_PGC#3	NAA20	1.56368	2.46087	3.32332	3.2481	1.77303
Female_PGC#4	NAALAD2	0.441744	0.441375	0.701965	2.17833	0.226382
Female_PGC#1	NAGA	1.8957	0.649312	0.819606	0.498113	1.42637
Female_PGC#1	NANOG	3.07214	0.328672	0.0615745	0.300534	4.87527
Female_PGC#1	NANOS3	4.13974	0.97887	0.102852	0.36056	7.18128
Female_PGC#4	NAPA	2.29021	3.0698	2.75967	3.84034	2.0824
Female_PGC#4	NAV2	0.170227	0.0718938	0.151243	1.14407	0.611185
Female_PGC#1	NBAS	3.02277	2.03797	1.40234	2.12471	1.0378
Female_PGC#3	NBPF10	0.680923	1.15528	1.84448	1.02284	1.45611
Female_PGC#1	NCBP2-AS2	2.51673	1.2287	1.01218	1.66876	4.32153
Female_PGC#4	NCK2	0.807935	0.989303	0.731492	2.62596	0.66822
Female_PGC#3	NCOA5	0.642358	1.24761	2.25108	1.27153	0.273981
Female_PGC#4	NCOA7	1.8735	2.59819	2.10846	3.46553	0.697369
Female_PGC#4	NDE1	0.362408	0.178918	0.343872	1.71371	0.455698
Female_PGC#3	NDFIP2	1.24036	2.55756	3.42394	2.80889	0.890004
Female_PGC#4	NDRG4	0.185914	0.446687	0.286979	1.22082	0.391456
Female_PGC#1	NDUFA9	3.36196	1.8099	2.01123	3.34952	2.99861
Female_PGC#1	NDUFAB1	6.61073	5.89989	5.22061	5.14522	6.33887
Female_PGC#3	NDUFB6	4.95515	6.60434	6.60009	6.29803	3.76879
Female_PGC#1	NDUFS5	5.24074	4.97002	2.61803	3.54091	5.92295
Female_PGC#2	NDUFV3	3.09424	5.35373	4.86589	4.97041	3.05161
Female_PGC#3	NECAB1	0.494602	1.05457	2.66197	0.759341	1.18467
Female_PGC#4	NEDD4L	0.54134	0.82821	0.950887	2.62171	0.369741
Female_PGC#4	NEK1	2.14099	2.9604	3.2712	4.06307	0.812512
Female_PGC#3	NEK9	1.05699	2.06796	2.9109	1.47266	0.255527
Female_PGC#3	NF1	1.17536	1.84735	2.77126	2.02846	0.792961
Female_PGC#3	NFAT5	1.30055	2.55197	3.21465	1.79909	0.66232
Female_PGC#1	NFE2L3	1.2932	0.392966	0.240529	0.97879	4.02511
Female_PGC#4	NFIA-AS1	0.00437227	0.0208578	0.0885383	1.27784	0
Female_PGC#4	NFKB2	0.61098	0.223289	0.0506167	1.95288	0.631835
Female_PGC#3	NGLY1	1.97776	3.59454	4.41559	3.71283	0.908298
Female_PGC#2	NGRN	3.64277	5.36789	4.03671	4.44655	0.161967
Female_PGC#1	NHP2	5.14784	4.96568	1.98368	4.12999	4.78571
Female_PGC#4	NID2	0.351059	0.224527	0.286996	1.9503	0.479207
Female_PGC#4	NIN	0.385004	0.413604	0.239115	1.94374	0.314583
Female_PGC#1	NIP7	2.78493	2.34521	1.77101	1.90221	1.68163
Female_PGC#3	NIPBL	3.24014	4.39495	5.90049	5.24214	1.81902
Female_PGC#1	NKAIN4	1.84105	0.233311	0.0599057	0.0262342	0.416747
Female_PGC#3	NKAP	2.65016	5.12184	5.13395	4.68919	2.22473
Female_PGC#3	NKIRAS1	1.18183	2.17427	3.56263	3.44039	0.447815
Female_PGC#4	NKIRAS1	1.18183	2.17427	3.56263	3.44039	0.447815
Female_PGC#4	NLRP11	0.0205086	0.00350419	0.0495453	1.82108	0
Female_PGC#4	NLRP14	0.0783683	0.364107	0.639093	2.00686	0
Female_PGC#4	NLRP2	1.99361	1.97553	1.45307	4.60484	1.19769
Female_PGC#4	NLRP5	0.0771937	0.1024	0.410852	5.98609	0
Female_PGC#4	NLRP7	2.24276	2.80762	0.817168	4.60873	0.29221
Female_PGC#1	NMRAL1	2.22416	1.96198	0.658079	1.38061	1.50875
Female_PGC#2	NMU	1.06632	4.6243	2.9894	0.815768	4.16858
Female_PGC#4	NOBOX	0.00549056	0.0269443	0.492747	3.15356	0
Female_PGC#2	NOL12	1.96876	3.92156	2.75255	3.99389	1.1428
Female_PGC#3	NOL8	2.69163	3.64827	5.21681	3.49764	1.1238
Female_PGC#1	NOP10	4.9293	2.23846	1.74738	4.32702	4.90907
Female_PGC#1	NOP16	2.99785	2.36513	1.52634	1.98195	2.42782
Female_PGC#3	NOTCH2	0.968927	1.6317	2.7724	1.82909	0.647019
Female_PGC#3	NOTCH2NL	1.87536	3.40273	4.98677	4.11786	1.10863
Female_PGC#3	NPC2	4.69101	4.15516	5.83342	5.14172	6.168
Female_PGC#4	NPL	0.378605	0.896352	1.31441	2.35965	0.119467
Female_PGC#1	NPM1	6.94634	6.13355	6.02456	5.68772	7.51087
Female_PGC#4	NPM2	0.160801	0.0815321	0.229432	2.13214	0.0328235
Female_PGC#4	NR1D2	1.03617	1.80806	2.13109	2.97973	0.198774
Female_PGC#1	NR2C2AP	1.41354	0.432829	0.151202	0.744336	0.987307
Female_PGC#4	NR2E3	0.044167	0.00714501	0.108416	1.41284	0
Female_PGC#4	NR3C2	0.103219	0.374462	0.268881	1.01167	0
Female_PGC#4	NRG4	0.0448155	0.200942	0.220053	2.25908	0.022947
Female_PGC#1	NRK	3.14406	1.46161	1.85136	0.808676	3.52263
Female_PGC#4	NRXN1	0.154073	0.101453	0.585323	1.65668	0.0762931
Female_PGC#4	NRXN3	0.157196	0.0693704	0.19627	1.63222	0
Female_PGC#1	NSMAF	2.16379	0.817225	0.71938	0.273499	0.752026
Female_PGC#3	NSRP1	2.81634	3.28682	4.84762	3.8828	2.01365
Female_PGC#4	NSUN5	1.70029	2.98613	2.70586	3.78314	1.76648
Female_PGC#3	NSUN7	0.273464	0.576094	1.89256	1.19298	0.296148
Female_PGC#1	NT5C3B	2.14224	0.713374	1.6718	0.93196	4.73418
Female_PGC#2	NT5DC2	0.897321	2.79626	2.49541	2.61796	2.02597
Female_PGC#3	NUDT21	3.31239	3.8664	4.85443	3.85603	3.04301
Female_PGC#3	NUF2	1.21847	2.98504	3.49035	1.37987	1.41141
Female_PGC#3	NUFIP2	1.96747	2.68841	3.5865	2.52661	1.06088
Female_PGC#3	NUP210L	0.0251899	0.406698	1.95777	0.486479	0
Female_PGC#2	OBSL1	1.44802	3.04404	0.996829	1.94774	1.41577
Female_PGC#1	OCLN	1.44393	0.503367	0.506319	0.380425	1.07011
Female_PGC#4	ODF2L	1.33737	2.4916	3.18229	4.51034	1.3851
Female_PGC#3	OFD1	2.92559	4.09755	4.66378	5.27727	1.15813
Female_PGC#4	OFD1	2.92559	4.09755	4.66378	5.27727	1.15813
Female_PGC#1	OGT	2.58467	1.23266	1.20052	1.73557	0.916106
Female_PGC#2	OLMALINC	0.168419	0.886816	0.30236	0.534782	0
Female_PGC#4	OOSP2	0.0125471	0.028023	0.0239294	2.9641	0
Female_PGC#1	OR7E156P	1.33608	0.274666	0.270829	0.178955	0
Female_PGC#3	ORC4	2.36768	2.95	4.16894	3.40747	1.68104
Female_PGC#3	ORMDL1	2.84036	3.93611	4.95299	4.21552	2.39198
Female_PGC#4	OSBPL10	0.0477846	0.260657	0.220111	2.90215	0.231121
Female_PGC#1	OSBPL3	1.9846	1.39741	0.510625	0.999568	0.90391
Female_PGC#3	OSBPL8	2.85085	4.68274	5.23012	6.3096	2.59242
Female_PGC#4	OSBPL8	2.85085	4.68274	5.23012	6.3096	2.59242
Female_PGC#4	OSTF1	1.0438	1.69778	0.930928	2.23553	0.72045
Female_PGC#3	OTUD6A	0.246451	0.21801	2.25253	0.424477	0.0219378
Female_PGC#3	OXCT1	0.93793	2.21904	2.76451	1.1919	0.592707
Female_PGC#3	OXR1	0.9439	2.87042	3.74746	3.00996	0.46999
Female_PGC#4	P2RX4	0.568868	0.288998	0.254237	2.18681	0.273916
Female_PGC#3	P4HA2	0.51346	2.12462	2.28819	1.38374	0.504578
Female_PGC#2	PABPC4	2.81724	4.54097	3.43733	4.00139	1.23073
Female_PGC#4	PADI6	0.108542	0.149625	0.0244755	4.46138	0
Female_PGC#3	PAGE2	0.209823	1.67144	3.53957	2.78615	0
Female_PGC#3	PAGE2B	0.398761	3.50697	5.3318	4.06925	0
Female_PGC#3	PAGE5	0.341065	1.47415	3.16867	1.8178	0.00990884
Female_PGC#1	PAICS	3.54313	3.05968	2.68892	1.9836	3.93913
Female_PGC#3	PAIP1	2.7382	2.82379	4.46771	4.98666	3.45394
Female_PGC#4	PAIP1	2.7382	2.82379	4.46771	4.98666	3.45394
Female_PGC#3	PAK1	2.50937	2.29324	3.71743	3.50329	1.79415
Female_PGC#4	PALLD	0.878595	1.32706	1.58391	2.50942	0.528747
Female_PGC#2	PAM	0.502286	1.44533	0.969044	0.696566	1.01193
Female_PGC#4	PAPD7	0.649715	1.00767	1.22934	2.26019	0.121359
Female_PGC#3	PARD6B	0.65796	1.19423	2.29259	1.114	0.840674
Female_PGC#3	PARP6	0.665307	0.853352	2.56886	0.993701	0.201342
Female_PGC#2	PAX6	0.156168	3.04733	2.66031	0.581532	0
Female_PGC#3	PAX6	0.156168	3.04733	2.66031	0.581532	0
Female_PGC#1	PCBD2	1.58505	0.992947	0.254544	0.580461	0.487311
Female_PGC#2	PCDH11X	0.176767	1.71879	0.549424	0.566096	0.201666
Female_PGC#4	PCDH15	0.0277114	0.0264489	0.0272307	1.93427	0.0159754
Female_PGC#1	PCED1B	1.04538	0.222863	0.175744	0.0403533	0.812852
Female_PGC#4	PCGF3	1.39034	2.374	2.57626	3.9644	1.06489
Female_PGC#4	PCGF5	0.416734	1.55839	2.02827	3.04698	0.0384149
Female_PGC#3	PCID2	1.53556	2.26619	3.68853	2.23228	1.53139
Female_PGC#3	PCM1	4.01026	5.51528	5.95787	5.06723	2.4639
Female_PGC#4	PCMT1	3.87194	4.11936	4.29696	5.49276	4.85023
Female_PGC#1	PCMTD2	3.30374	2.49295	2.28505	1.95373	1.25664
Female_PGC#1	PCSK1N	3.69571	2.84359	2.31307	2.89013	7.58132
Female_PGC#1	PCYOX1	3.686	3.49818	1.99445	1.34685	1.82743
Female_PGC#4	PDCD5	5.51262	6.91554	6.95605	8.13298	3.65048
Female_PGC#1	PDCD6	4.41182	3.62913	3.12778	3.55467	3.56949
Female_PGC#4	PDE4D	0.177106	0.401048	0.479248	1.23866	0.0492795
Female_PGC#3	PDE6D	1.05655	1.11417	2.77473	1.53264	1.07567
Female_PGC#4	PDE8B	0.185014	0.609509	0.572957	3.59272	0
Female_PGC#4	PDGFRL	0.38778	0.0346991	0.270598	2.49911	0.169505
Female_PGC#3	PDHA1	2.05712	3.38191	5.44597	5.17817	2.99262
Female_PGC#4	PDHA1	2.05712	3.38191	5.44597	5.17817	2.99262
Female_PGC#1	PDLIM1	3.15193	2.69742	1.44332	3.49567	2.62022
Female_PGC#3	PDPK1	0.807626	1.67561	2.70501	3.60987	0.685741
Female_PGC#4	PDPK1	0.807626	1.67561	2.70501	3.60987	0.685741
Female_PGC#1	PDPN	4.75425	1.59929	0.348399	2.38364	7.61622
Female_PGC#2	PDS5B	2.64683	4.11926	2.64512	2.65634	1.24329
Female_PGC#4	PDXDC2P	0.539606	0.318655	1.18968	1.7137	0
Female_PGC#4	PECAM1	0.227805	0.290111	0.268064	2.75077	0
Female_PGC#3	PEG3	1.3854	3.21303	3.37822	1.98473	0
Female_PGC#2	PEMT	1.16864	2.48229	1.36329	0.588709	4.36398
Female_PGC#2	PER3	0.49311	2.38795	1.96093	2.67832	0.0477153
Female_PGC#4	PER3	0.49311	2.38795	1.96093	2.67832	0.0477153
Female_PGC#3	PEX3	1.06758	1.27241	3.12464	1.52067	0.72146
Female_PGC#1	PFKL	2.60346	1.60548	0.625857	1.18242	3.0502
Female_PGC#4	PFKP	0.46601	0.0882433	0.0894739	4.08136	2.06239
Female_PGC#1	PFN1	7.61302	6.5201	5.04562	6.74622	8.09099
Female_PGC#3	PFN2	1.21495	1.61032	3.20807	4.44015	3.13424
Female_PGC#4	PFN2	1.21495	1.61032	3.20807	4.44015	3.13424
Female_PGC#3	PFN4	0.0157578	0.318429	1.1989	0.520592	0.00879205
Female_PGC#1	PGAM1	5.50934	4.62243	2.95121	3.39241	6.25404
Female_PGC#1	PGD	3.48808	3.24541	2.2847	2.30809	3.4125
Female_PGC#1	PGM1	2.0805	1.62035	0.378918	0.617652	3.16699
Female_PGC#1	PGM2	2.04666	1.42851	0.367194	0.632414	0.871015
Female_PGC#3	PGRMC1	0.921367	1.41529	1.88401	0.605713	3.83621
Female_PGC#4	PHACTR3	0.10785	0.137528	0.169832	1.84135	0
Female_PGC#1	PHB	4.78427	4.19388	2.96098	4.3583	4.93853
Female_PGC#1	PHB2	3.596	3.19123	2.49587	2.38577	3.90719
Female_PGC#4	PHEX	0.067172	0.102206	0.188852	2.94647	0.0631816
Female_PGC#3	PHF7	0.791798	1.24139	2.63471	1.74593	0.320305
Female_PGC#3	PHF8	1.46307	3.62438	4.7221	3.22803	0.344379
Female_PGC#3	PHIP	2.98139	2.52417	4.66719	2.82829	3.13416
Female_PGC#1	PHLDA3	1.57558	0.378158	0.119279	0.408781	6.01442
Female_PGC#3	PHLPP1	0.492584	1.81997	2.29307	1.74232	0.144673
Female_PGC#3	PHTF1	0.526676	1.70324	2.36403	1.02413	1.15759
Female_PGC#4	PHYKPL	0.376213	0.465964	0.720123	1.48821	0.292431
Female_PGC#3	PIGK	0.699097	1.02038	2.34787	1.72699	1.1266
Female_PGC#3	PIGP	2.54328	4.83251	5.58118	3.84061	1.38458
Female_PGC#2	PIGT	1.6478	3.03842	1.54391	2.08764	1.79305
Female_PGC#3	PIH1D2	0.22754	1.39011	2.40924	1.22986	0.074167
Female_PGC#3	PIK3R3	1.92148	3.81779	4.27985	3.87046	1.05232
Female_PGC#1	PIM2	3.54842	1.60264	0.648709	1.02416	5.62986
Female_PGC#1	PIN4	4.11994	4.09968	2.77677	3.56747	4.422
Female_PGC#4	PINX1	1.66099	1.40611	1.34344	3.21964	1.36911
Female_PGC#3	PIP5K1A	0.759718	1.17574	2.42702	1.18298	0.8031
Female_PGC#4	PITRM1	1.0741	2.68351	2.3155	4.12623	0.393139
Female_PGC#3	PJA2	1.91986	3.37564	4.78304	3.71038	1.52289
Female_PGC#4	PKD1L3	0.0125024	0.00968875	0.0342297	1.32255	0
Female_PGC#1	PKM	5.09216	3.85557	2.86659	3.65299	7.0952
Female_PGC#4	PKP4	0.655105	1.02036	1.37243	2.63746	0.502347
Female_PGC#1	PLAU	1.32107	0.157586	0.0294968	0.0862175	0.320401
Female_PGC#1	PLBD1	3.28416	0.991795	0.804703	0.678811	4.87797
Female_PGC#1	PLD3	3.42492	1.80483	1.43046	2.24107	4.14366
Female_PGC#4	PLEK2	0.0899877	0.095801	0.168612	3.24216	0
Female_PGC#3	PLEKHF2	0.699595	0.749804	2.28194	2.11395	0.352726
Female_PGC#4	PLEKHM2	0.572008	0.519987	0.990922	1.93916	0.298946
Female_PGC#1	PLOD1	2.7688	0.898417	0.269796	0.530637	3.04807
Female_PGC#4	PLS1	0.235879	0.529642	1.55523	2.11922	0.100428
Female_PGC#1	PLTP	1.96641	0.407548	0.167203	0.172101	2.83897
Female_PGC#1	PMAIP1	3.38642	2.34853	0.353009	0.863302	3.14612
Female_PGC#4	PNLDC1	1.11826	1.71452	2.49483	3.8508	0.0710907
Female_PGC#1	PNP	1.5499	0.287756	0.196633	0.907799	3.0225
Female_PGC#3	PNPLA4	1.72605	3.50314	4.05898	3.26136	0.102886
Female_PGC#1	PNPT1	2.62183	1.85305	1.23574	1.07828	1.02235
Female_PGC#3	PNRC1	1.70474	2.08951	3.30555	2.31112	2.62206
Female_PGC#4	POLE4	1.48656	2.55664	2.36844	3.98614	2.70528
Female_PGC#3	POLI	1.18411	2.27827	2.92989	1.83636	0.703296
Female_PGC#3	POLK	1.15531	1.05997	2.66784	1.3768	1.03216
Female_PGC#3	POLN	0.0831814	0.575267	3.36698	1.24953	0.0296309
Female_PGC#1	POLR1C	3.37941	3.26872	2.47024	2.69459	1.26159
Female_PGC#1	POLR2D	2.70033	1.84411	2.30618	1.90673	1.65212
Female_PGC#4	POLR2E	4.43887	5.06747	4.15904	5.78271	4.19692
Female_PGC#4	POLR2J	3.7893	4.40391	3.71127	5.46191	3.98715
Female_PGC#4	POLR2J4	0.331878	0.396159	0.45565	1.59826	0
Female_PGC#1	POLR3K	2.60337	2.44297	0.436392	0.545418	3.16966
Female_PGC#3	POMC	0.375604	1.08928	1.78206	1.49405	0.243028
Female_PGC#4	POMZP3	0.244745	0.385861	0.509521	2.24927	0.0741553
Female_PGC#4	PON1	0.00676021	0.0325258	0.266359	1.97437	0.0168153
Female_PGC#4	PON2	1.44643	1.8375	1.47819	4.24146	2.49504
Female_PGC#3	PON3	0.666914	2.20687	3.05626	1.91998	0
Female_PGC#1	POP5	2.61173	2.05664	0.935275	2.161	2.39061
Female_PGC#1	POP7	2.7842	2.2167	0.982521	2.63079	3.37179
Female_PGC#4	POPDC3	0.599963	1.01254	1.35635	2.35759	0.151841
Female_PGC#4	POR	1.64323	2.19991	1.01363	3.39262	1.52432
Female_PGC#1	POU5F1	4.32719	0.912816	0.303005	1.18945	8.74436
Female_PGC#1	POU5F1B	0.666764	0.0673284	0.0155591	0.105706	2.36736
Female_PGC#1	PPAPDC1B	1.71399	0.793297	0.301137	0.283915	1.83104
Female_PGC#4	PPIC	1.26505	2.20572	2.97054	3.71174	1.79704
Female_PGC#2	PPID	2.59338	4.02545	2.04513	2.49011	1.57425
Female_PGC#4	PPM1F	0.583906	1.08888	1.94437	2.69697	0.385496
Female_PGC#1	PPM1H	1.08442	0.234929	0.0394916	0.648984	0.47319
Female_PGC#1	PPM1N	3.07824	0.674607	0.157653	0.427779	5.03925
Female_PGC#3	PPME1	1.88213	3.29263	3.54501	2.80498	1.03351
Female_PGC#1	PPP1CA	2.23502	1.55719	0.830253	1.69185	5.55016
Female_PGC#1	PPP1R14C	1.0607	0.36513	0.000764235	0.172049	0.104073
Female_PGC#1	PPP1R15A	2.9445	0.752583	0.948033	1.50335	1.62064
Female_PGC#3	PPP1R16A	0.486022	0.735843	2.13428	1.85295	0.601348
Female_PGC#3	PPP1R2	1.79652	2.38889	3.68339	3.34407	2.06205
Female_PGC#1	PPP1R3B	1.89141	0.681306	0.733787	0.512813	1.68162
Female_PGC#3	PPP2R3C	2.09217	4.49434	4.68527	4.87169	1.3138
Female_PGC#3	PPP4R4	0.126139	0.329776	1.5042	0.846523	0.0775023
Female_PGC#1	PQLC3	3.96028	1.97145	0.762822	2.79197	1.64265
Female_PGC#2	PRADC1	0.82846	2.66439	1.60302	3.00383	0.97788
Female_PGC#4	PRADC1	0.82846	2.66439	1.60302	3.00383	0.97788
Female_PGC#3	PRAME	2.76235	5.80973	5.52855	5.4573	0
Female_PGC#1	PRDM1	1.61688	0.664933	0.719035	0.209411	2.96074
Female_PGC#3	PRDM9	0.015326	0.382779	2.36411	0.296569	0
Female_PGC#1	PRDX3	3.89351	1.93254	1.35881	3.07648	4.2232
Female_PGC#2	PRDX5	4.9611	6.45763	5.33375	5.98262	5.63389
Female_PGC#1	PRELP	1.15382	0.0722345	0.136923	0.157669	0.176926
Female_PGC#3	PRKACB	0.553968	1.36895	2.76099	0.481254	0.88308
Female_PGC#4	PRKD2	1.14931	1.32611	0.753088	2.75003	0.799139
Female_PGC#1	PRODH	1.37904	0.571805	0.158792	0.469863	4.8333
Female_PGC#1	PROM1	1.59821	0.336036	0.144063	0.492586	0.871484
Female_PGC#3	PRPF39	1.78124	2.16455	3.46024	2.68413	0.682343
Female_PGC#3	PRPF40A	4.68694	5.04919	6.15649	5.32292	3.74541
Female_PGC#3	PRSS21	0.233423	1.43332	1.86967	0.952981	0
Female_PGC#3	PRSS50	0.134662	0.926653	2.32355	1.32128	0
Female_PGC#2	PRTG	0.444669	2.16489	1.63337	1.63658	1.77234
Female_PGC#1	PSAP	6.71586	5.4619	4.59534	5.47013	4.48876
Female_PGC#4	PSD3	1.02475	1.46392	0.675964	3.37642	0.20777
Female_PGC#4	PSEN2	0.421497	0.552711	0.691994	1.84632	1.37032
Female_PGC#3	PSMA8	0.151556	2.33007	4.49971	1.77411	0
Female_PGC#1	PSMB6	5.34516	4.83234	3.98461	4.67678	5.94629
Female_PGC#3	PSMD10	2.77867	5.1734	5.64815	4.96276	1.61816
Female_PGC#2	PSME1	2.5709	4.11941	1.28074	1.46401	1.65707
Female_PGC#1	PSME2	2.90659	1.56161	1.37862	1.02273	2.87055
Female_PGC#4	PSMG4	1.47388	4.23699	3.72833	5.08421	0.86969
Female_PGC#1	PSORS1C2	1.49408	0.236596	0.043796	0.0767234	0.560579
Female_PGC#4	PSTPIP1	0.258119	0.178274	0.277119	3.49631	0
Female_PGC#1	PTBP1	3.32129	1.89585	1.31545	2.13112	2.75884
Female_PGC#3	PTBP2	1.23773	3.64157	4.29457	3.59809	0.307753
Female_PGC#1	PTBP3	2.58878	1.67485	1.17771	1.054	1.43316
Female_PGC#3	PTGER4P2-CDK2AP2P2	0.144688	0.522908	1.90922	0.473695	0
Female_PGC#3	PTK2	2.20332	3.59647	4.46402	3.38567	2.33336
Female_PGC#1	PTN	1.86921	0.314768	0.230933	0.363984	0.864234
Female_PGC#2	PTOV1	2.09994	3.50246	1.70434	2.59208	3.31268
Female_PGC#3	PTPDC1	0.411499	1.32036	2.08355	1.93822	0.411229
Female_PGC#3	PTPMT1	1.11951	2.10379	3.29547	3.32336	1.63305
Female_PGC#4	PTPMT1	1.11951	2.10379	3.29547	3.32336	1.63305
Female_PGC#1	PTPN11	2.3276	0.765222	1.24627	0.775704	1.52364
Female_PGC#1	PTPN2	3.23348	2.6398	1.82298	2.72491	2.12043
Female_PGC#4	PTPN21	0.289327	0.637752	0.664103	1.84158	0.0792369
Female_PGC#3	PTPN4	0.802947	1.10665	2.39945	1.68458	0.761999
Female_PGC#4	PTPRK	0.273516	0.271745	0.49735	2.14924	0.32294
Female_PGC#2	PTPRU	0.505727	1.91282	0.461128	1.64207	0.363423
Female_PGC#1	PTRF	0.939855	0.179808	0.0787545	0.0526986	2.02318
Female_PGC#3	PVRL3	0.415123	1.51167	2.33602	1.7681	0.387798
Female_PGC#1	PXDN	2.54144	0.460709	0.617202	1.05782	2.25416
Female_PGC#4	PXK	1.06675	2.28089	2.3618	3.06418	0.345416
Female_PGC#3	PXT1	0.00992404	0.384649	1.22979	0.00515973	0
Female_PGC#1	PYY	2.24344	1.42044	0.510742	0.281426	0.0397646
Female_PGC#4	QKI	1.78696	3.12572	3.1159	3.6722	0.874561
Female_PGC#1	QPRT	3.70447	1.54801	0.230448	0.472414	4.7476
Female_PGC#1	RAB11FIP4	1.47844	0.783794	0.177226	0.524579	0.33899
Female_PGC#1	RAB15	1.37543	0.147412	0.220029	0.554563	2.71695
Female_PGC#4	RAB27A	0.372342	0.25407	0.632802	3.45142	0.474362
Female_PGC#3	RAB28	1.42951	3.10081	3.22189	1.59003	1.29662
Female_PGC#2	RAB40B	0.202024	1.78271	1.03756	2.20348	0.982489
Female_PGC#4	RAB40B	0.202024	1.78271	1.03756	2.20348	0.982489
Female_PGC#3	RAD17	2.53039	4.04946	4.29327	3.17723	1.43268
Female_PGC#1	RAD21	4.01413	2.65148	2.50893	3.21001	2.88871
Female_PGC#3	RAD51AP2	0.123844	0.430439	5.455	0.375805	0
Female_PGC#3	RAD51C	2.43081	4.07704	4.3394	3.50232	1.04298
Female_PGC#4	RAD54L2	0.599458	1.14838	1.77408	2.42339	1.12637
Female_PGC#3	RAD9B	0.239389	2.27222	3.89183	0.941394	0.0139153
Female_PGC#3	RAE1	2.99424	3.93887	4.50489	4.0037	1.39247
Female_PGC#4	RALB	1.48388	1.7306	1.57385	3.73866	1.31228
Female_PGC#4	RALY	2.6499	3.60436	3.72477	4.20807	4.08724
Female_PGC#4	RARRES2	0.845596	0.465405	0.292029	3.2896	3.49402
Female_PGC#3	RASA1	1.3397	2.74354	3.57854	2.07951	0.531991
Female_PGC#1	RASD1	2.44885	0.619095	0.136371	0.318396	3.0658
Female_PGC#4	RASGRF1	0.0262039	0.0278547	0.164798	1.92749	0.00862617
Female_PGC#4	RASL10A	0.300031	0.158839	0.139483	1.80111	0.258135
Female_PGC#3	RB1	0.898988	1.59808	2.37229	1.2526	0.639411
Female_PGC#3	RBBP8	2.00117	3.66206	4.95454	4.61148	0.618718
Female_PGC#3	RBL2	0.991455	1.73641	2.76303	1.05044	0.525705
Female_PGC#3	RBM26-AS1	0.33017	1.27938	1.92412	0.489845	0.0308289
Female_PGC#3	RBM27	3.20117	4.00809	5.00539	4.7253	2.24527
Female_PGC#1	RBM3	5.09063	5.09907	2.41718	2.43101	5.07354
Female_PGC#3	RBM44	0.129975	1.43866	2.36471	1.50265	0
Female_PGC#3	RBM46	1.71307	5.0875	4.94006	5.58132	0
Female_PGC#4	RBM46	1.71307	5.0875	4.94006	5.58132	0
Female_PGC#4	RBMS2	0.419065	0.124647	0.136977	2.10335	0.138627
Female_PGC#4	RBMX2	2.28585	3.93498	2.4559	5.19759	1.69651
Female_PGC#2	RBP1	1.24838	3.56926	0.924018	1.83718	2.20577
Female_PGC#2	RBP4	0.144603	2.28834	1.89343	0.690923	0.0229975
Female_PGC#3	RBP4	0.144603	2.28834	1.89343	0.690923	0.0229975
Female_PGC#3	RC3H1	1.39252	2.49749	3.3196	2.93079	0.491056
Female_PGC#1	RCC2	3.0376	1.85994	1.16051	2.51483	2.23295
Female_PGC#3	RCN2	2.26502	3.89497	4.83451	2.84651	4.55232
Female_PGC#4	RCN3	0.478987	0.983392	0.344654	2.97895	0.191016
Female_PGC#3	REC114	0.268278	1.18666	2.48986	2.25553	0
Female_PGC#2	REC8	1.58991	4.4372	0.606533	0.193843	0.848817
Female_PGC#4	RELN	0.0659311	0.481992	0.615902	1.67926	0.0640351
Female_PGC#4	REXO2	3.43574	5.01071	4.22617	6.32158	2.71029
Female_PGC#4	RFTN1	0.161346	0.193648	0.0580258	1.99311	0.0560642
Female_PGC#2	RFX6	0.0674916	1.87634	0.335645	0.331753	0
Female_PGC#1	RGS10	1.8632	0.505057	0.136259	0.0565367	1.93433
Female_PGC#4	RGS2	2.08754	1.87834	1.93762	4.32729	0.327071
Female_PGC#3	RGS22	0.231422	0.433048	1.64295	1.09638	0
Female_PGC#1	RHOC	4.66412	3.28542	2.49704	4.39763	5.47518
Female_PGC#3	RHOXF1	0.337537	1.57754	2.09971	1.54641	0.0360585
Female_PGC#3	RIBC2	0.200701	1.90127	2.85865	0.824539	0.0666741
Female_PGC#4	RIIAD1	0.187211	0.514651	0.404789	2.46717	0
Female_PGC#1	RMND1	3.14926	1.34096	0.630228	1.56738	2.16282
Female_PGC#3	RNASEH2B	1.09658	3.48901	3.88637	2.98254	0.594954
Female_PGC#1	RND2	1.31496	0.541303	0.162753	0.622311	1.88641
Female_PGC#3	RNF103	0.302928	0.761664	1.80003	1.52146	0.143312
Female_PGC#4	RNF111	1.11425	1.26537	1.89324	2.88599	0.462344
Female_PGC#1	RNF125	1.18546	0.489835	0.0825415	0.987907	1.45053
Female_PGC#3	RNF138	2.65282	3.75127	4.80095	4.00119	0.856472
Female_PGC#3	RNF157	0.0944912	1.02678	1.54501	1.0646	0.0814921
Female_PGC#3	RNF167	2.93781	3.53785	4.55102	4.70808	2.87412
Female_PGC#4	RNF167	2.93781	3.53785	4.55102	4.70808	2.87412
Female_PGC#4	RNF168	3.70427	4.38561	2.86073	5.31643	2.12781
Female_PGC#1	RNF181	4.43607	3.76932	1.69457	3.65168	4.69756
Female_PGC#3	RNF19A	1.64705	2.58236	3.65601	2.58113	0.78151
Female_PGC#4	RNF20	0.986518	1.37775	1.28516	2.9266	1.2089
Female_PGC#3	RNF212	0.216098	1.2141	1.7991	1.42392	0.258486
Female_PGC#3	RNF212B	0.199163	0.336323	1.78742	0.162556	0
Female_PGC#3	RNF32	0.506106	0.97245	3.0096	1.27005	0.0400868
Female_PGC#4	RNF38	0.852864	1.2138	1.61726	2.68085	0.555927
Female_PGC#1	RNF44	1.84908	1.00152	0.413364	0.515296	1.08015
Female_PGC#3	RNF6	1.32433	2.59623	3.00078	2.51235	1.26129
Female_PGC#3	RNFT1	1.21436	1.83139	2.8636	1.60693	0.437996
Female_PGC#2	RNMT	3.12979	5.05303	4.79352	4.22724	2.16966
Female_PGC#1	RNPEP	2.85591	1.9771	0.70069	0.69365	3.23829
Female_PGC#4	RNU6-2	0.359649	0.487395	1.78904	2.30792	0
Female_PGC#3	RORA-AS1	0.200011	0.530193	1.57491	1.09235	0
Female_PGC#4	RPA1	3.03834	2.80006	2.07547	4.28428	2.96129
Female_PGC#1	RPARP-AS1	1.05453	0.356824	0.228368	0.257871	0
Female_PGC#1	RPL10A	7.05912	5.76593	4.63281	5.35909	8.40918
Female_PGC#1	RPL11	7.65532	6.04145	4.48336	5.72904	8.63097
Female_PGC#1	RPL12	6.48452	5.43822	4.16725	5.11901	8.01608
Female_PGC#1	RPL13	8.11919	7.30487	5.8513	6.56581	8.88894
Female_PGC#1	RPL13A	5.19469	2.9152	1.06226	1.51573	9.41001
Female_PGC#1	RPL14	6.05695	5.57998	4.14545	4.817	7.57918
Female_PGC#1	RPL15	8.42978	7.81053	6.4268	7.07295	9.29799
Female_PGC#1	RPL17	3.22704	2.2956	1.7785	2.19195	3.7496
Female_PGC#1	RPL18	7.57439	6.56041	4.97113	5.72584	8.13822
Female_PGC#1	RPL18A	8.29528	7.42958	5.25895	6.00846	8.76162
Female_PGC#1	RPL22	6.03276	4.80104	3.74626	4.04962	7.14227
Female_PGC#1	RPL23	6.48388	4.88595	3.2458	4.10913	6.99299
Female_PGC#1	RPL23A	8.03679	7.20696	5.76488	6.04037	7.92123
Female_PGC#1	RPL24	6.51953	5.49221	4.82984	5.5023	7.08778
Female_PGC#1	RPL26	7.62495	5.90567	4.03769	5.3894	8.02772
Female_PGC#1	RPL27	7.02358	6.13025	4.02407	5.07221	6.93877
Female_PGC#1	RPL27A	7.41398	6.37725	5.26119	5.14731	8.40783
Female_PGC#1	RPL28	6.57563	6.20379	4.47105	4.726	7.99987
Female_PGC#1	RPL3	7.96512	6.82294	6.12608	6.5546	9.583
Female_PGC#1	RPL31	8.00109	6.83483	5.39057	6.46095	7.36248
Female_PGC#1	RPL32	7.80513	7.13668	5.42466	6.13542	8.64286
Female_PGC#1	RPL34	7.86612	6.79557	4.44633	5.36179	8.36598
Female_PGC#1	RPL35	6.67445	6.20074	4.75427	5.65	7.78574
Female_PGC#1	RPL35A	6.99766	5.78091	4.87947	5.08069	8.09318
Female_PGC#1	RPL36A	2.52313	1.68937	0.787012	1.41548	4.04109
Female_PGC#1	RPL37	7.95639	6.7552	4.46063	5.11739	7.10308
Female_PGC#1	RPL38	6.62912	6.12333	4.49348	5.48785	5.93554
Female_PGC#1	RPL39	6.35508	4.5848	2.31916	3.99001	7.8213
Female_PGC#1	RPL4	7.33664	6.42231	5.61869	5.62256	7.44877
Female_PGC#1	RPL41	7.90948	6.74624	5.06417	5.96913	9.10239
Female_PGC#1	RPL7	8.63688	7.568	7.20331	7.63236	8.93965
Female_PGC#1	RPL7A	7.31671	6.93786	5.21602	5.99696	8.17364
Female_PGC#1	RPL7L1	3.31362	2.04084	2.09255	2.09476	3.31069
Female_PGC#1	RPL8	8.10973	7.25132	6.04748	6.42336	9.33886
Female_PGC#1	RPL9	7.61567	6.59957	5.90815	6.4012	8.01815
Female_PGC#1	RPLP0	8.13909	7.57661	6.30222	6.64407	8.23226
Female_PGC#1	RPS10	3.04632	2.5461	1.30573	1.92386	5.94992
Female_PGC#1	RPS13	7.32888	6.57153	4.91945	5.83347	7.82917
Female_PGC#1	RPS14	8.23398	7.27619	5.45987	6.5233	9.44776
Female_PGC#1	RPS15A	6.50821	4.61935	3.75583	4.15748	8.13917
Female_PGC#1	RPS16	7.01122	6.5683	4.9609	4.76171	7.82237
Female_PGC#1	RPS18	8.55499	7.09734	5.59585	6.31683	9.60523
Female_PGC#1	RPS18P9	2.34716	1.18223	1.10697	1.08293	0
Female_PGC#1	RPS2	7.38836	5.7178	3.44895	4.93572	10.0447
Female_PGC#1	RPS24	7.91205	6.95391	5.03792	6.1718	7.45875
Female_PGC#1	RPS25	6.65302	6.18748	4.9024	5.42054	7.32056
Female_PGC#1	RPS29	6.91399	6.49668	5.0877	5.54032	7.29008
Female_PGC#1	RPS3	8.35547	6.89751	5.56541	5.4544	9.00968
Female_PGC#1	RPS3A	8.29467	7.18709	6.04492	6.77981	8.77871
Female_PGC#1	RPS4X	7.95926	5.92625	4.82113	6.20545	9.32731
Female_PGC#1	RPS6	8.64522	7.92222	6.83393	7.48194	8.86615
Female_PGC#3	RPS6KA6	0.406133	1.81616	2.61108	1.32315	0.050713
Female_PGC#1	RPS7	7.69572	6.43341	5.94067	6.21372	8.4733
Female_PGC#1	RPSA	7.32586	6.87503	5.30021	5.95661	7.81398
Female_PGC#1	RPSAP9	2.48159	2.15999	1.24853	1.48982	0
Female_PGC#1	RPUSD3	3.93811	3.32383	1.95784	2.76773	4.19968
Female_PGC#3	RRAGB	1.23047	2.98738	3.42149	3.829	0.76343
Female_PGC#4	RRAGB	1.23047	2.98738	3.42149	3.829	0.76343
Female_PGC#2	RRAGD	0.310297	2.46103	1.62478	1.43782	0.0420238
Female_PGC#1	RRP9	2.93989	1.94278	0.957617	1.60097	3.81089
Female_PGC#3	RSRP1	2.61321	3.35874	4.46133	2.69547	0
Female_PGC#1	RSU1	3.9159	2.78695	1.14786	2.57439	2.74137
Female_PGC#3	RTCA	1.35883	2.18622	3.58227	2.81792	1.53257
Female_PGC#4	RTFDC1	2.54862	3.10066	2.6456	3.94428	2.91524
Female_PGC#1	RTN2	0.820569	0.174263	0.0550458	0.102651	1.97033
Female_PGC#4	RUFY1	1.28909	1.16981	1.30893	3.3013	1.50344
Female_PGC#4	RUFY3	1.65144	2.17457	2.19149	3.64645	0.992276
Female_PGC#4	RUNX1T1	0.504574	1.1705	1.28928	3.41152	0.102434
Female_PGC#3	RWDD2B	0.666799	1.49326	2.29193	0.771769	0.228508
Female_PGC#4	RYR3	0.126135	0.10599	0.513188	1.47916	0
Female_PGC#1	S100A13	3.08762	1.3727	1.05273	0.526986	3.63645
Female_PGC#3	S100PBP	2.21329	3.97971	3.89602	2.38363	0.707617
Female_PGC#1	SALL4	1.99026	0.659071	0.44867	1.62815	1.60306
Female_PGC#4	SAMD12	0.208961	0.294383	0.254332	2.41402	0.0990674
Female_PGC#4	SAMD4A	0.0355849	0.0525233	0.0907654	1.4164	0.047783
Female_PGC#2	SAP25	1.03427	2.81314	0.652284	1.2607	0
Female_PGC#3	SAP30	0.373983	1.05474	2.25079	0.594452	0.732997
Female_PGC#4	SARDH	0.0615105	0.017058	0.081833	1.53579	0.0589204
Female_PGC#1	SASH1	1.47575	0.423867	0.231274	0.451144	0.218398
Female_PGC#4	SASS6	1.24617	2.17055	2.89568	3.81897	1.17896
Female_PGC#1	SAT1	5.75556	2.42045	1.66416	1.09638	8.11021
Female_PGC#4	SATB1	0.322498	0.961005	1.56989	2.23681	0.0874996
Female_PGC#4	SCARB1	0.447116	0.257513	0.456692	2.95314	0.442358
Female_PGC#2	SCCPDH	1.07078	4.5346	3.94718	4.44622	0.269176
Female_PGC#3	SCCPDH	1.07078	4.5346	3.94718	4.44622	0.269176
Female_PGC#4	SCCPDH	1.07078	4.5346	3.94718	4.44622	0.269176
Female_PGC#3	SCEL	0.0336088	0.637762	1.59953	1.14741	0
Female_PGC#3	SCML1	0.55532	0.96317	5.20599	2.68548	0.033724
Female_PGC#2	SCML2	1.02432	4.12791	4.26244	2.69654	0.407008
Female_PGC#3	SCML2	1.02432	4.12791	4.26244	2.69654	0.407008
Female_PGC#1	SCP2	3.27491	2.2128	1.65303	2.15172	2.47683
Female_PGC#1	SCPEP1	2.82137	1.02844	1.04991	1.52147	2.14357
Female_PGC#1	SDC2	2.55518	1.82573	0.720318	0.899794	5.72626
Female_PGC#1	SDCBP	4.87875	3.26425	2.64039	2.55603	3.77898
Female_PGC#2	SDF2L1	2.31849	4.70894	3.52712	3.59565	3.71918
Female_PGC#4	SDHAF3	1.45806	1.78655	1.58899	2.95971	0
Female_PGC#3	SEC11A	3.19475	3.78206	4.47327	3.17049	5.13676
Female_PGC#3	SEC22C	1.48663	2.36691	3.08235	1.57814	1.35071
Female_PGC#3	SEC24B	0.555553	0.99495	2.39689	2.12081	0.317738
Female_PGC#2	SEL1L	1.18508	2.72423	2.33934	2.83164	0.665616
Female_PGC#2	SELM	1.5306	2.91194	1.36502	1.38097	2.07976
Female_PGC#3	SELT	1.68716	2.25827	3.76531	3.60558	3.07378
Female_PGC#3	SENP1	0.888265	1.67527	2.95745	0.984423	0.379237
Female_PGC#3	SENP6	2.32177	2.64892	4.42948	3.74348	1.57208
Female_PGC#4	SEPW1	4.20902	5.00751	3.75303	6.28914	5.19428
Female_PGC#1	SERINC5	1.88268	0.728419	0.41203	1.17603	0.180506
Female_PGC#2	SERPINE2	1.07678	2.85367	1.51731	1.85188	7.30047
Female_PGC#4	SERPINF1	1.1962	0.913376	0.391987	5.16221	0.203771
Female_PGC#1	SERPING1	3.26425	2.94371	0.74376	0.784969	2.55146
Female_PGC#1	SERPINH1	3.75384	1.07502	1.68848	0.465168	4.66055
Female_PGC#3	SESN1	1.5981	1.52036	3.1235	2.60524	0.896895
Female_PGC#2	SESN3	0.682719	2.09893	1.36251	1.37517	0.551761
Female_PGC#3	SETD2	2.44426	2.91906	4.05358	2.91663	1.63249
Female_PGC#3	SETD9	0.58849	1.06926	2.66621	0.775319	0.58368
Female_PGC#4	SETX	2.35017	1.93975	2.95663	4.07592	1.3227
Female_PGC#1	SF3B3	3.08582	2.54605	2.15297	1.61299	1.74181
Female_PGC#1	SFRP2	1.77301	0.334108	0.0325677	0.0566236	5.70255
Female_PGC#4	SGMS2	0.0815631	0.262073	0.51617	2.28241	0.00810715
Female_PGC#3	SGOL2	1.34004	3.33014	3.8503	3.32509	1.51894
Female_PGC#4	SH2D4A	0.255225	0.542323	0.584254	3.32279	0.243185
Female_PGC#4	SH3GL2	0.308803	1.3534	1.29094	2.6771	0
Female_PGC#4	SH3GL3	0.195191	0.493803	0.385035	3.06151	0.86049
Female_PGC#3	SH3GLB1	2.71025	4.07106	4.60083	4.75092	1.75799
Female_PGC#4	SH3KBP1	0.946765	1.56964	1.70598	3.40433	0.502167
Female_PGC#3	SHCBP1L	0.0287354	0.365348	3.81802	0.31053	0
Female_PGC#4	SHD	2.25037	0.590244	0.13625	4.05713	0.515188
Female_PGC#1	SHISA5	3.96958	4.19353	1.67978	1.52497	2.84632
Female_PGC#1	SHPK	1.01836	0.097634	0.125187	0.110006	0.0159839
Female_PGC#4	SHTN1	2.75028	3.74014	3.41004	5.1155	0
Female_PGC#2	SIGIRR	2.31213	4.19199	1.50442	1.96092	3.13475
Female_PGC#4	SIGLEC10	0.1876	0.0086916	0.0225868	1.56806	0
Female_PGC#2	SIGMAR1	2.1487	3.88612	2.33219	2.66421	1.46443
Female_PGC#4	SIL1	1.61018	1.38058	1.94357	3.23337	0.772714
Female_PGC#3	SIMC1	0.181067	0.694991	1.64323	0.654121	0.346754
Female_PGC#2	SIX1	0.201477	2.1236	1.39547	1.70188	0
Female_PGC#3	SKAP1	0.0553212	0.369317	1.53693	0.337932	0
Female_PGC#2	SKAP2	1.8513	4.39947	1.46705	1.89618	0.133264
Female_PGC#2	SLC12A2	0.554359	2.20947	1.89124	2.35638	0.421846
Female_PGC#2	SLC25A1	1.33563	3.05237	0.854266	1.86427	2.39006
Female_PGC#1	SLC25A11	2.98799	2.28538	1.53747	1.57509	3.72507
Female_PGC#2	SLC25A14	0.869044	3.19457	3.04886	2.27162	0.974814
Female_PGC#3	SLC25A14	0.869044	3.19457	3.04886	2.27162	0.974814
Female_PGC#1	SLC25A16	1.62548	0.250937	0.129738	0.435638	1.75581
Female_PGC#3	SLC25A31	0.288568	3.16595	4.5025	2.38931	0
Female_PGC#1	SLC29A1	2.87223	1.65272	0.264321	2.10897	2.01113
Female_PGC#4	SLC29A4	0.0975407	0.185005	0.134109	2.1289	0.11289
Female_PGC#1	SLC2A1	1.57917	0.75247	0.165851	0.202281	1.9835
Female_PGC#1	SLC35A5	1.99972	1.02297	0.747594	1.03804	1.21946
Female_PGC#4	SLC35G1	0.118877	0.111387	0.317392	1.1981	0.459158
Female_PGC#4	SLC37A1	0.444526	0.321263	0.734512	2.017	0.527743
Female_PGC#1	SLC37A3	1.32071	0.229921	0.34267	0.866746	1.06471
Female_PGC#4	SLC38A8	0.0390321	0.014716	0.0142882	2.28217	0
Female_PGC#4	SLC39A4	0.757178	1.10759	1.01197	2.65948	0.487353
Female_PGC#3	SLC39A6	1.42688	2.11234	3.68415	3.47563	0.675036
Female_PGC#1	SLC3A2	4.13338	1.78462	1.03001	1.75419	5.54842
Female_PGC#1	SLC43A1	2.50121	0.359242	0.202247	0.08713	2.95747
Female_PGC#1	SLC44A2	1.5604	0.410113	0.171941	1.43414	1.76782
Female_PGC#1	SLC47A1	1.08737	0.187834	0.0596023	0.662813	0.0800591
Female_PGC#1	SLC4A11	1.21512	0.755366	0.131495	0.205678	0.200134
Female_PGC#3	SLC4A1AP	2.65622	4.24356	5.1256	4.22693	1.32179
Female_PGC#3	SLC6A10P	0.0600269	0.892461	1.92147	0.282553	0
Female_PGC#4	SLC6A20	0.0636196	0.00843195	0.103524	1.94931	0.0311901
Female_PGC#4	SLC7A11	0.0728808	0.302559	0.256075	1.45452	0.0998854
Female_PGC#1	SLC7A3	1.9411	2.00678	0.0405678	0.15373	0.731828
Female_PGC#1	SLC7A8	3.1619	0.876796	0.724669	2.65322	2.63566
Female_PGC#4	SLC8A1	0.326224	0.101764	0.127231	2.14549	0.00731271
Female_PGC#3	SLC9A6	1.01559	1.37217	2.587	1.50419	0.139033
Female_PGC#4	SLCO1B3	0.0341713	0.186289	0.579869	1.50786	0
Female_PGC#4	SLCO3A1	0.332312	0.323293	0.477266	1.52819	0.0451284
Female_PGC#4	SLCO4A1	0.0740067	0.0600286	0.127831	2.43477	0.0483035
Female_PGC#3	SLCO6A1	0.0147441	0.268282	1.25349	0.815511	0.0250557
Female_PGC#4	SLK	2.74909	3.57107	4.02854	4.82869	0.520682
Female_PGC#3	SMAD4	0.889945	2.26835	2.49273	2.30079	0.487912
Female_PGC#1	SMAGP	2.25403	1.40734	0.246896	1.5813	6.90921
Female_PGC#4	SMAP1	2.64335	3.44166	3.43549	4.43618	2.09946
Female_PGC#4	SMARCA2	2.34895	2.1762	1.4906	5.39001	0.175751
Female_PGC#2	SMC1B	1.14761	6.8416	7.3112	4.63131	0.00874078
Female_PGC#3	SMC1B	1.14761	6.8416	7.3112	4.63131	0.00874078
Female_PGC#3	SMC3	5.46553	7.13238	7.38659	6.1987	3.50841
Female_PGC#3	SMDT1	1.52235	1.6243	2.88734	3.32596	3.22057
Female_PGC#4	SMDT1	1.52235	1.6243	2.88734	3.32596	3.22057
Female_PGC#3	SMEK1	1.49756	2.21668	3.13061	2.35911	1.17415
Female_PGC#4	SMS	3.03153	5.59081	3.72641	6.1165	5.12088
Female_PGC#1	SNAP23	2.20121	0.612135	0.887077	1.69859	2.68626
Female_PGC#3	SNAPC1	3.13905	4.26632	5.31177	3.71648	2.43835
Female_PGC#1	SNAPC3	1.83422	1.28866	0.898713	0.6246	2.15357
Female_PGC#3	SNAR-C3	1.08063	4.05603	6.3937	5.03304	0
Female_PGC#3	SNAR-C4	0.337093	1.97978	3.18913	1.88766	0
Female_PGC#3	SNAR-E	0.0848765	0.611206	2.18188	1.42423	0
Female_PGC#3	SNAR-F	0.107815	0.794481	2.11339	1.78959	0
Female_PGC#3	SNAR-G1	0.0511225	0.453025	1.936	0.830039	0
Female_PGC#1	SNHG16	4.20497	3.45254	2.38906	2.73373	0
Female_PGC#1	SNHG5	3.34788	2.69496	2.00885	1.63673	0
Female_PGC#1	SNRPE	5.81396	5.65878	4.69487	4.81118	5.79193
Female_PGC#1	SNX10	2.34984	1.35391	0.747629	0.635681	3.88989
Female_PGC#4	SNX11	0.645621	0.828406	1.15195	3.16347	0.451633
Female_PGC#4	SNX30	0.658179	1.72577	1.54931	2.61065	0.0826808
Female_PGC#3	SOHLH1	0.154101	0.437236	1.9955	3.86302	0
Female_PGC#4	SOHLH1	0.154101	0.437236	1.9955	3.86302	0
Female_PGC#3	SOS2	0.243778	0.607677	1.80827	0.946362	0.0525645
Female_PGC#1	SOX15	3.14214	1.57032	0.254867	0.270667	3.72912
Female_PGC#1	SOX17	1.55643	0.65287	0.619562	0.572292	5.77595
Female_PGC#1	SOX4	5.43336	4.28639	2.94343	4.19432	5.52262
Female_PGC#3	SPAG16	1.36379	2.71882	3.60587	3.34565	1.252
Female_PGC#3	SPAG5-AS1	0.0357115	0.17464	0.89061	0.0844523	0
Female_PGC#3	SPAG6	0.139707	0.919781	1.99231	1.93225	0.0243458
Female_PGC#1	SPANXA2-OT1	1.3737	0.516469	0.676546	0.586373	0
Female_PGC#3	SPATA22	0.812469	2.6208	5.63228	1.46149	0
Female_PGC#4	SPATA5	1.21629	1.69646	1.23725	3.15254	0.306003
Female_PGC#4	SPATA6L	0.204845	0.481275	1.16873	3.16839	0.105793
Female_PGC#3	SPCS1	3.56418	5.70925	5.9795	5.24871	4.30611
Female_PGC#3	SPDL1	1.82754	3.35115	4.4668	4.09014	1.76345
Female_PGC#3	SPDYA	0.0851527	0.581217	3.5421	0.813312	0.0244949
Female_PGC#3	SPESP1	1.38327	2.52966	3.87936	2.63148	0
Female_PGC#3	SPG20	0.794178	1.05975	2.65754	3.05177	0.406248
Female_PGC#4	SPG20	0.794178	1.05975	2.65754	3.05177	0.406248
Female_PGC#4	SPINK2	2.03568	4.31516	3.54523	4.56586	1.12246
Female_PGC#3	SPINT2	3.66778	3.64036	5.35457	5.59717	5.34972
Female_PGC#3	SPO11	0.0927498	1.01507	5.16303	1.01208	0
Female_PGC#2	SPOCK3	0.0645683	1.44151	0.416038	1.73751	0
Female_PGC#4	SPOCK3	0.0645683	1.44151	0.416038	1.73751	0
Female_PGC#3	SPOPL	0.351847	0.715417	1.89032	1.25851	0.0955612
Female_PGC#4	SPTAN1	2.27788	2.47179	2.16575	3.67264	1.51033
Female_PGC#4	SPTBN5	0.021451	0.0607831	0.118468	1.23032	0.00951987
Female_PGC#1	SPTSSA	2.44614	0.957077	0.27958	1.12361	3.87675
Female_PGC#4	SQLE	3.82028	4.82791	4.65475	5.48525	2.46461
Female_PGC#4	SQRDL	0.279426	0.112262	0.307347	2.74042	0
Female_PGC#4	SQSTM1	2.30998	2.8438	2.05104	3.55785	2.0355
Female_PGC#3	SRP9	3.3611	4.12672	5.876	5.57364	4.59974
Female_PGC#3	SRR	0.18302	0.467817	2.14293	0.322904	0.587179
Female_PGC#3	SRRM2-AS1	0.0470057	0.255491	1.14409	0.656876	0.074145
Female_PGC#3	SSFA2	0.905514	1.7478	2.47268	1.87908	0.211611
Female_PGC#4	SSR4	3.84512	5.10805	5.21552	5.69014	4.9988
Female_PGC#4	SSTR5-AS1	0.00928413	0	0.00613166	1.38144	0
Female_PGC#1	ST6GALNAC1	1.50426	0.110675	0.0695366	0	0.0496815
Female_PGC#1	ST6GALNAC3	1.25622	0.90569	0.155341	0.0507465	1.16024
Female_PGC#4	STAG3	0.60545	3.56411	3.73303	5.10986	0.154911
Female_PGC#4	STAT1	0.708105	1.48335	0.779158	2.57328	0.37703
Female_PGC#1	STAT3	2.9662	1.48104	1.32422	1.47414	0.940915
Female_PGC#3	STAU1	3.10201	3.4359	4.70807	5.16317	3.19373
Female_PGC#4	STAU1	3.10201	3.4359	4.70807	5.16317	3.19373
Female_PGC#3	STK17B	0.43508	1.15018	1.80895	1.6502	0.0836949
Female_PGC#2	STK24	1.685	3.3678	1.5909	2.60835	0.722974
Female_PGC#3	STK31	0.963679	5.20423	5.93975	5.93991	0
Female_PGC#4	STK31	0.963679	5.20423	5.93975	5.93991	0
Female_PGC#1	STOM	3.56647	1.53349	1.24335	0.752239	3.52323
Female_PGC#1	STON2	1.96953	1.24663	0.503859	1.0324	1.29155
Female_PGC#1	STRA6	1.1322	0.390655	0.0371339	0.0149089	0.936758
Female_PGC#2	STRA8	0.101071	3.66368	0.281653	0.407328	0
Female_PGC#3	STRADB	1.44289	2.87899	3.41865	2.83688	1.26212
Female_PGC#3	STRIP2	0.715485	0.902459	3.00413	1.29573	0.00895982
Female_PGC#4	STX8	1.55404	2.44487	1.35995	4.4825	2.42662
Female_PGC#1	SUCLA2	3.31024	2.48847	2.14294	2.30508	4.28921
Female_PGC#4	SUDS3	3.00658	3.60329	2.71098	5.19836	3.76476
Female_PGC#3	SUGP2	2.00627	3.57394	4.46173	3.08119	1.14963
Female_PGC#1	SUMF1	1.82109	0.456805	0.327024	0.436476	0.849428
Female_PGC#1	SURF6	3.15196	2.12592	2.00736	2.44687	1.3405
Female_PGC#1	SUSD2	1.86094	0.216398	0.0625194	0.182278	0.265256
Female_PGC#3	SVIL-AS1	0.8174	0.828071	1.98254	0.983726	0
Female_PGC#4	SVIP	2.68185	4.7182	4.26514	5.76725	0.936644
Female_PGC#3	SYCE1	0.640273	3.75981	4.8673	3.14671	0
Female_PGC#3	SYCE2	0.184932	2.01555	3.40045	1.05857	0.130237
Female_PGC#3	SYCE3	0.223116	2.47201	4.7107	1.28334	0.0465847
Female_PGC#3	SYCP1	0.0907088	0.708468	5.54376	1.92323	0
Female_PGC#3	SYCP2	0.914552	3.68344	5.94287	4.35851	0.1022
Female_PGC#4	SYCP2L	0.707642	1.26563	0.434744	2.96422	0.231367
Female_PGC#3	SYCP3	3.06725	6.14113	7.78369	5.87221	0.0232626
Female_PGC#3	SYNGR4	0.0497855	1.58792	2.81753	0.35524	0.0475774
Female_PGC#3	SYPL1	2.33715	3.75106	5.08637	4.1636	3.51478
Female_PGC#1	SYTL4	1.5996	0.618032	0.337555	0.519255	0.0230961
Female_PGC#3	TAF12	2.7462	3.4464	4.9103	4.06583	2.24342
Female_PGC#3	TAF4B	0.904577	1.56307	2.53901	2.48868	0.224344
Female_PGC#1	TAGLN3	1.15744	0.415158	0.0361165	0.00515328	0.473476
Female_PGC#3	TANK	1.03611	1.22727	2.36295	2.11057	0.819569
Female_PGC#3	TAOK1	2.12149	2.38341	3.62552	3.12381	1.38099
Female_PGC#3	TAPT1	0.382619	0.476291	1.52763	1.0996	0.13408
Female_PGC#4	TAX1BP1	4.40699	5.13929	5.00377	6.11366	3.60069
Female_PGC#3	TAZ	0.256903	0.381611	1.39421	0.476714	0.47472
Female_PGC#3	TBC1D15	1.55775	2.49569	3.29198	3.10918	0.812015
Female_PGC#4	TBC1D17	0.888738	0.744859	0.833222	2.48073	1.01345
Female_PGC#3	TBC1D28	0.0105958	0.0200554	0.801007	0.0283074	0
Female_PGC#4	TBCD	2.16589	1.49448	1.26386	3.95243	1.05296
Female_PGC#4	TBL1XR1	2.6192	3.41648	3.06688	4.4021	1.21005
Female_PGC#4	TBPL2	0.518872	0.641298	0.487682	3.92834	0.0131134
Female_PGC#4	TBX3	0.416573	0.842984	0.391677	2.48043	0.28721
Female_PGC#3	TC2N	0.107541	0.348809	1.46511	1.31866	0.144346
Female_PGC#2	TCEAL4	3.50924	5.83071	4.55344	4.86467	3.06185
Female_PGC#3	TCF12	1.77856	2.55273	3.11355	1.4874	0.871427
Female_PGC#4	TCF4	1.32196	1.21465	1.92456	2.951	0.928334
Female_PGC#1	TCL1A	4.35831	2.29766	1.48236	4.40611	0.191013
Female_PGC#1	TCL1B	3.43044	1.17864	0.335575	4.49363	3.07295
Female_PGC#3	TCP11	0.211201	1.43055	2.51151	2.18004	0
Female_PGC#3	TCTN1	0.833436	2.26156	3.21126	1.55544	0.48071
Female_PGC#4	TDRD1	0.673802	3.85714	3.67776	5.76395	0
Female_PGC#3	TDRD5	0.289375	0.581557	2.12059	1.98783	0.0172115
Female_PGC#3	TDRD6	0.391233	2.12424	3.57159	3.21936	0
Female_PGC#4	TDRD6	0.391233	2.12424	3.57159	3.21936	0
Female_PGC#3	TDRD9	0.69402	2.25624	2.97662	3.21141	0
Female_PGC#4	TDRD9	0.69402	2.25624	2.97662	3.21141	0
Female_PGC#1	TEAD4	2.10292	0.617916	0.25203	0.245246	2.6909
Female_PGC#4	TEKT5	0.0424155	0.0460451	0.042003	0.901171	0
Female_PGC#3	TERF2IP	2.51774	4.3645	4.41538	2.99358	2.20878
Female_PGC#4	TESC	0.20519	0.53338	0.727294	2.54928	0.00650995
Female_PGC#1	TET1	3.42962	1.73686	0.799247	2.79085	3.61768
Female_PGC#3	TEX101	0.230245	0.649672	2.63609	0.717282	0
Female_PGC#3	TEX11	0.297206	2.28725	3.49307	1.45713	0
Female_PGC#3	TEX12	0.139818	0.672232	4.10193	1.00291	0
Female_PGC#3	TEX14	0.437536	1.87589	2.27749	1.33877	0.0168539
Female_PGC#3	TEX15	0.35572	3.11507	4.56359	3.29349	0.0138062
Female_PGC#3	TEX19	0.0180849	0.196413	2.01904	0.254939	0.0295822
Female_PGC#3	TEX264	1.81514	3.28515	3.8618	3.12519	2.10088
Female_PGC#3	TEX30	3.34987	6.31694	7.6878	5.90604	1.65447
Female_PGC#1	TFAP2C	1.79304	0.517039	0.0281808	0.392451	4.87548
Female_PGC#1	TFCP2L1	2.674	1.04097	0.467525	1.0676	0.777961
Female_PGC#4	TGFA	0.027355	0	0.0285375	1.51481	0
Female_PGC#4	TGM7	0.0134224	0.0285625	0.0637036	2.71449	0
Female_PGC#3	THAP7	1.94153	2.55301	3.64689	2.55687	1.46009
Female_PGC#1	THAP9-AS1	2.0222	1.14968	1.09214	0.87444	0.641832
Female_PGC#1	THOC6	2.0515	1.15121	0.777447	1.57189	2.15991
Female_PGC#2	THRA1/BTR	0.0415521	3.75945	0.187966	0.0573176	0
Female_PGC#4	THRB	0.0373615	0.0292842	0.028933	1.64152	0.0143657
Female_PGC#4	THRSP	0.0175774	0.00450795	0.0365714	1.48908	0
Female_PGC#4	THTPA	0.359862	0.811903	1.04415	1.9106	0
Female_PGC#1	THY1	3.56416	0.437606	0.235526	0.539439	3.87693
Female_PGC#1	TIMM8A	2.42356	2.08566	1.0337	1.9761	1.67136
Female_PGC#3	TIPARP	0.412016	1.00581	2.31229	1.89157	0.515622
Female_PGC#1	TKT	3.43815	2.89139	1.32171	1.9722	5.32918
Female_PGC#4	TLE6	0.577179	0.635627	0.287441	4.25867	0.174891
Female_PGC#3	TM2D3	2.29988	2.69931	3.94782	3.87643	2.30739
Female_PGC#3	TMED2	3.86565	4.29678	5.26072	5.00473	4.15112
Female_PGC#1	TMED9	4.26471	2.99946	3.43445	3.49712	5.59524
Female_PGC#4	TMEM106C	1.55086	2.00661	1.90596	3.30657	1.23851
Female_PGC#3	TMEM107	1.50367	3.47768	4.12108	2.7983	1.17036
Female_PGC#3	TMEM108	0.442676	0.607254	2.17775	2.225	0.179433
Female_PGC#1	TMEM11	3.60616	2.67575	2.40297	3.62791	3.04344
Female_PGC#3	TMEM116	0.789132	1.59022	2.79255	1.63066	0.205509
Female_PGC#1	TMEM123	4.84186	3.65863	2.77527	1.9055	5.55796
Female_PGC#1	TMEM160	1.96699	1.37678	0.247796	1.57528	4.59894
Female_PGC#4	TMEM163	0.0867221	0.0689368	0.0652424	2.98654	0.0686357
Female_PGC#1	TMEM170A	3.1187	2.57984	2.25985	1.64316	3.01529
Female_PGC#4	TMEM2	0.174314	0.123084	0.145056	0.902696	0.0771755
Female_PGC#4	TMEM200A	0.0537203	0.129479	0.275793	1.31422	0.0361137
Female_PGC#1	TMEM205	2.89717	1.29631	0.574324	1.49388	2.50016
Female_PGC#4	TMEM230	3.49158	3.99948	4.16512	4.96447	3.06687
Female_PGC#4	TMEM232	0.0770972	0.388107	0.650372	2.23092	0.0394863
Female_PGC#4	TMEM243	0.826735	0.798924	1.31	3.37985	1.51373
Female_PGC#4	TMEM255B	0.0835803	0.114794	0.142543	1.73815	0.223126
Female_PGC#3	TMEM263	0.897395	1.50517	2.39725	2.02831	0
Female_PGC#2	TMEM52	0.168574	1.5596	0.946181	0.649923	0.160977
Female_PGC#4	TMEM56	0.357314	0.498154	0.798097	1.61833	0.0478535
Female_PGC#3	TMEM57	0.979974	1.65926	2.55178	2.0411	1.09851
Female_PGC#3	TMEM70	2.23391	3.54145	4.06429	3.27951	1.60314
Female_PGC#2	TMEM97	2.67656	4.51477	3.71907	2.88739	3.19637
Female_PGC#2	TMEM98	1.43566	3.01659	3.32674	1.4495	2.65261
Female_PGC#3	TMEM98	1.43566	3.01659	3.32674	1.4495	2.65261
Female_PGC#3	TMF1	2.26167	2.65336	3.91206	2.76388	1.17762
Female_PGC#1	TMSB10	6.47326	4.68987	2.71583	3.94934	7.49301
Female_PGC#2	TMSB15A	1.44849	3.37337	1.57046	1.4316	1.32436
Female_PGC#1	TMSB4X	8.20202	3.36392	2.22285	2.5788	9.7276
Female_PGC#3	TNFAIP8L3	0.0380584	0.105036	1.64345	0.0685916	0.0117748
Female_PGC#3	TNKS2-AS1	0.149539	0.519391	2.65928	0.688813	0.0562066
Female_PGC#4	TOB1	1.21087	2.45329	2.57381	3.87679	0.544357
Female_PGC#1	TOMM5	5.07275	3.89139	3.06058	4.01428	1.51383
Female_PGC#1	TOMM7	5.29907	4.84422	3.77818	3.88098	5.72186
Female_PGC#2	TOP1MT	0.994469	2.78002	1.93608	2.31955	1.01326
Female_PGC#3	TOPAZ1	0.133228	0.948133	2.13454	1.28696	0
Female_PGC#1	TOR3A	2.747	1.19816	0.447914	3.68197	0.971232
Female_PGC#4	TP53INP1	0.728809	2.70529	2.18522	2.87669	0.239818
Female_PGC#3	TP53TG3D	0.207309	0.989566	1.88222	1.07633	0
Female_PGC#4	TP63	0.033556	0.0342262	0.255007	2.34244	0
Female_PGC#1	TPM1	4.01236	2.23933	2.94499	3.03365	6.31956
Female_PGC#1	TPM2	4.26504	3.95605	1.98424	1.81285	4.79458
Female_PGC#1	TPM3	5.44782	4.77947	2.88821	4.40018	4.94811
Female_PGC#1	TPM4	4.70965	0.994337	0.657749	0.344947	5.95917
Female_PGC#4	TPO	0.074438	0.00388991	0.00142714	1.9706	0
Female_PGC#1	TPP1	1.98697	0.762027	0.192586	0.308045	0.819112
Female_PGC#3	TPTE	1.19249	2.9908	4.36361	2.54243	0
Female_PGC#4	TRAF2	1.04382	1.43554	1.67386	3.22829	1.01872
Female_PGC#3	TRAF3IP1	0.384987	0.831448	2.13759	1.48848	0.493585
Female_PGC#1	TRAF4	1.09471	0.467142	0.324064	0.418977	2.77637
Female_PGC#4	TRAF5	0.315207	0.500864	0.858117	2.13907	0.0374604
Female_PGC#3	TRAFD1	1.33767	2.7377	3.43657	1.25265	0.662558
Female_PGC#1	TRANK1	1.31641	0.158811	0.292648	0.289667	0.44429
Female_PGC#4	TRAPPC1	2.28999	3.21292	2.88434	3.7161	5.02228
Female_PGC#1	TRAPPC4	3.96167	3.35221	2.11548	2.75779	3.94509
Female_PGC#1	TRAPPC5	3.6841	2.83791	1.31414	2.72208	0.161014
Female_PGC#3	TRAPPC6B	1.23233	2.74357	3.09569	3.31673	0.770427
Female_PGC#3	TRAPPC8	1.85733	2.44071	3.66313	2.38348	0.515986
Female_PGC#1	TRIAP1	2.42913	0.803286	1.54245	2.47085	2.56726
Female_PGC#1	TRIM2	1.67054	0.322837	0.37804	0.438993	2.51747
Female_PGC#3	TRIM23	1.06408	1.80738	2.55345	1.87224	0.207829
Female_PGC#3	TRIM4	0.409414	1.19624	1.57922	0.869227	0.122372
Female_PGC#3	TRIM44	1.24362	2.05981	2.95675	3.12367	1.00037
Female_PGC#4	TRIM50	0.0793623	0.520153	0.897007	1.77235	0
Female_PGC#4	TRIM77	0.00212201	0	0.00366759	1.54737	0
Female_PGC#1	TRIML2	1.12097	0.169897	0.379898	1.3641	2.54943
Female_PGC#3	TRIP12	2.39622	3.88503	4.31336	4.62411	1.6623
Female_PGC#4	TRIP12	2.39622	3.88503	4.31336	4.62411	1.6623
Female_PGC#3	TRIP13	1.42599	3.16403	4.07349	1.44042	0.89617
Female_PGC#2	TRMT10A	1.49969	4.04118	3.70753	3.2382	0.374666
Female_PGC#3	TRMT1L	1.70401	3.28229	3.78819	2.03234	0.542892
Female_PGC#4	TRMT44	0.19382	0.18197	0.419334	3.18759	0.648045
Female_PGC#3	TRMU	0.745784	1.5687	2.38921	1.9307	1.04328
Female_PGC#4	TRPM5	0.0283716	0.00123195	0.107912	1.35564	0
Female_PGC#4	TSC22D1	2.09341	3.0121	2.88835	4.52926	3.34594
Female_PGC#1	TSPAN18	1.20437	0.378699	0.116504	0.106379	1.06776
Female_PGC#2	TSPYL2	1.90266	5.23822	5.24085	3.88743	0.715605
Female_PGC#3	TSPYL2	1.90266	5.23822	5.24085	3.88743	0.715605
Female_PGC#4	TSPYL5	0.738714	1.75111	2.23621	2.53371	0
Female_PGC#3	TSPYL6	0.188861	1.12381	1.80429	0.770682	0
Female_PGC#4	TSSC1	0.798808	1.25056	1.20659	2.38424	2.06094
Female_PGC#2	TSTD1	2.45338	4.82657	3.21326	5.1286	4.01207
Female_PGC#4	TSTD1	2.45338	4.82657	3.21326	5.1286	4.01207
Female_PGC#3	TTC28-AS1	1.10957	2.30875	3.27307	1.76981	0
Female_PGC#4	TTC39A	0.56609	0.605103	1.27963	2.319	0.0716581
Female_PGC#1	TUBA1A	4.62765	4.03022	1.17481	0.850869	7.68545
Female_PGC#1	TUBA1C	4.61466	3.97736	2.27611	5.35195	5.19699
Female_PGC#3	TUBA3C	0.127403	0.77859	2.65367	0.528952	0
Female_PGC#2	TUBA3D	1.44302	4.88629	4.40607	2.92832	0
Female_PGC#3	TUBA3D	1.44302	4.88629	4.40607	2.92832	0
Female_PGC#3	TUBA3E	0.19658	0.592324	1.88017	0.66716	0
Female_PGC#4	TUBA4A	0.0466531	0.324204	0.280813	2.47235	0
Female_PGC#4	TUBA4B	0.0299998	0.0132723	0.02404	2.68221	0
Female_PGC#1	TUBB	6.66866	6.08775	4.28346	4.22133	8.15619
Female_PGC#2	TUBB2B	1.35215	4.24168	0.521467	0.201942	4.49098
Female_PGC#1	TUBB3	2.30795	0.759403	0.266995	0.573844	0
Female_PGC#1	TUBB4A	0.805538	0.0988385	0.0670239	0.0950619	0.258569
Female_PGC#4	TUBB8	0.738467	0.938056	0.815332	3.90218	0
Female_PGC#3	TUBGCP3	1.14061	2.1319	2.79734	2.41517	0.388343
Female_PGC#1	TUFT1	1.6797	0.868594	0.22809	0.633196	0.852053
Female_PGC#3	TXLNA	1.31787	2.06178	2.85998	2.4698	0.636391
Female_PGC#2	TXLNB	0.258891	2.69162	0.0701424	0.156457	0
Female_PGC#1	TXN	5.71491	3.41673	1.25792	3.91011	6.23658
Female_PGC#4	TXN2	3.67716	3.56157	2.89638	5.27165	3.07868
Female_PGC#1	TXNDC12	4.26157	1.7102	1.48835	2.0593	5.10723
Female_PGC#4	TXNDC16	0.644647	1.92365	1.74592	2.61338	0.192068
Female_PGC#3	UAP1	1.41141	2.62244	3.17165	2.11591	1.24544
Female_PGC#4	UBA5	1.11722	1.37571	3.16691	4.38626	1.56558
Female_PGC#3	UBA6	1.15686	1.76457	3.04322	2.6995	1.27104
Female_PGC#3	UBE2B	3.50136	5.10385	5.18272	3.71911	3.24517
Female_PGC#4	UBE2D3	5.07045	5.65761	5.60993	6.48448	4.81739
Female_PGC#3	UBE2D4	0.548701	0.842338	2.05022	1.85763	0.485476
Female_PGC#4	UBE2E1	0.76172	1.25665	1.36314	2.15381	2.02742
Female_PGC#4	UBE2E2	2.62092	3.4486	4.02851	4.82041	2.48028
Female_PGC#3	UBE2E3	2.45229	4.13007	4.28245	3.9094	2.87548
Female_PGC#3	UBE2F	2.18277	2.48017	4.17882	4.17893	2.08819
Female_PGC#3	UBE2Q1	0.966513	1.72433	2.82258	1.91905	0.745213
Female_PGC#4	UBE2Q2	1.49163	1.16199	2.2312	3.24777	1.42261
Female_PGC#3	UBE2Q2P1	0.547841	0.491158	2.42049	1.67626	0
Female_PGC#2	UBE2T	3.39195	5.63311	3.32797	3.48103	3.00308
Female_PGC#3	UBE2W	1.49252	1.49468	2.9321	2.68361	1.03997
Female_PGC#3	UBE3A	2.15744	3.20497	3.71061	3.50421	2.23932
Female_PGC#2	UBL5	5.87699	7.34768	6.76048	7.15724	5.67225
Female_PGC#3	UBLCP1	1.27774	2.93401	3.06608	2.51625	1.24612
Female_PGC#4	UBXN11	0.941842	1.37366	0.880341	3.56487	0.484731
Female_PGC#3	UFD1L	2.88003	3.8046	4.68913	3.57882	3.26086
Female_PGC#3	UFL1	1.75488	2.72818	3.77701	3.27787	1.63802
Female_PGC#1	UGCG	2.112	1.10081	0.455411	1.3143	1.1005
Female_PGC#3	UGDH-AS1	3.90913	3.95877	4.92872	4.63147	0.0721654
Female_PGC#4	UGGT2	0.680058	1.86052	2.05715	2.79891	0.660104
Female_PGC#4	UHRF1	0.436953	0.802703	0.211164	1.64811	0
Female_PGC#3	UIMC1	1.86453	3.33137	4.33138	2.41982	0.50332
Female_PGC#3	ULK2	0.895963	2.45529	2.70123	1.95696	0.377047
Female_PGC#4	ULK4	0.570698	0.889474	0.705647	3.55274	0.199148
Female_PGC#1	UNC119	2.186	0.958865	0.514709	0.684899	3.41185
Female_PGC#4	UNC13C	0.031751	0.0288945	0.0201008	3.25938	0.0441304
Female_PGC#3	UNC50	1.84437	2.31385	3.74531	1.77047	1.42177
Female_PGC#3	UPB1	0.0418465	0.521257	2.33088	2.89002	0
Female_PGC#4	UPB1	0.0418465	0.521257	2.33088	2.89002	0
Female_PGC#4	UPK3B	0.104619	0.1958	0.0891402	0.834215	0.03351
Female_PGC#1	UPP1	3.22691	1.36265	0.401816	1.19857	3.15561
Female_PGC#1	UQCRH	6.07494	5.90877	4.84196	5.22525	6.74633
Female_PGC#3	URI1	1.16434	2.26524	2.98213	2.60966	0.996713
Female_PGC#1	UROD	3.68638	2.7725	1.75963	3.50738	3.34126
Female_PGC#1	USMG5	4.69801	4.05803	3.08365	4.09497	4.39124
Female_PGC#2	USP11	2.77555	4.9956	4.42829	2.69094	2.85894
Female_PGC#4	USP18	0.125853	0.109266	0.582956	1.2912	0.115098
Female_PGC#4	USP2	0.200869	1.17167	1.00034	3.22989	0.0215819
Female_PGC#1	USP28	2.3234	0.832043	0.938477	0.842712	2.44236
Female_PGC#4	USP30	0.473276	0.799972	1.55746	2.09463	0.122956
Female_PGC#3	USP37	1.42439	2.75876	4.01343	3.06445	0.668185
Female_PGC#3	USP42	0.635334	1.00132	2.13498	1.31219	0.52025
Female_PGC#3	USP47	1.86953	2.49195	3.85975	3.29712	1.41018
Female_PGC#3	USP6	0.5946	0.880082	2.41326	1.38749	0.175648
Female_PGC#3	USP9X	3.27076	5.01878	5.76812	5.25983	1.15998
Female_PGC#1	UTF1	0.967373	0.299662	0.0110212	0.0221833	4.40038
Female_PGC#1	UTRN	2.57575	1.55018	0.9633	0.38966	0.502273
Female_PGC#1	VAMP8	3.66172	1.32281	0.759409	2.72943	4.50945
Female_PGC#3	VAPA	3.85099	4.99018	5.61046	4.51322	3.62317
Female_PGC#1	VARS	1.82049	1.01828	0.70086	0.424959	1.17024
Female_PGC#1	VAT1	3.16306	2.90841	0.692506	1.23651	3.46082
Female_PGC#4	VAV3	0.16723	0.175005	0.223599	1.56297	0.0869901
Female_PGC#3	VCX	0.122054	0.553449	4.69469	2.91482	0
Female_PGC#3	VCX2	0.0352237	0.169036	2.49231	0.867388	0
Female_PGC#3	VCX3A	0.102514	0.275653	2.67828	1.29979	0.00688027
Female_PGC#3	VCX3B	0.11649	0.270849	2.61385	0.861958	0.0178765
Female_PGC#1	VENTX	0.601792	0.0580832	0.0129145	0.0346051	0.410258
Female_PGC#3	VEZF1	1.57793	1.94302	3.24217	2.88538	0.717554
Female_PGC#4	VGLL4	0.81207	1.59054	1.11437	3.1195	1.87721
Female_PGC#1	VIM	3.42667	1.20349	0.65646	1.02244	6.90607
Female_PGC#4	VLDLR	0.197161	0.388501	0.408578	1.94517	0.0628646
Female_PGC#4	VPS13B	0.831922	1.91297	1.9144	2.57747	0.22354
Female_PGC#3	VPS26A	2.43539	4.69753	5.18685	4.89807	1.63933
Female_PGC#3	VPS29	4.27731	4.49573	5.83744	4.98467	3.45702
Female_PGC#3	VPS35	3.76187	4.50147	5.45341	4.11012	3.75874
Female_PGC#3	VRK1	2.62178	4.89475	5.43464	4.75099	2.28848
Female_PGC#1	VSIG10	1.44495	0.294622	0.220826	0.693034	1.07702
Female_PGC#3	WASF1	1.22382	2.78386	4.1516	3.37697	0.60132
Female_PGC#2	WASF3	0.524228	2.4214	1.48022	1.35606	0.227779
Female_PGC#3	WBSCR22	4.51525	6.3983	7.27289	5.74838	2.6769
Female_PGC#1	WDR1	4.06886	3.0358	2.66105	3.70812	4.98321
Female_PGC#3	WDR31	0.291726	1.05039	1.94388	0.543265	0
Female_PGC#1	WDR46	2.66687	2.1628	1.72621	2.03799	2.51803
Female_PGC#1	WDR54	2.97722	2.71179	1.56322	1.35882	3.45455
Female_PGC#4	WDR76	0.524226	1.18261	0.909501	2.16068	0.324535
Female_PGC#4	WDSUB1	1.31949	2.29119	3.12668	3.56846	0.348306
Female_PGC#4	WEE2	0.00894642	0.0297986	0.121562	2.37041	0
Female_PGC#4	WFDC2	0.170201	0.300767	0.327168	3.48818	2.14318
Female_PGC#4	WFS1	1.04229	1.13912	1.12236	3.25301	0.732289
Female_PGC#3	WNK1	2.29774	2.83615	4.0216	2.14714	1.55718
Female_PGC#1	WNT2B	1.39769	0.409022	0.201926	0.223388	0.611892
Female_PGC#4	WWOX	1.00098	2.00691	0.958268	2.69341	0.244204
Female_PGC#3	XK	0.0543109	0.437608	1.66965	0.772914	0.00935975
Female_PGC#3	XKR9	0.20127	0.911794	1.75985	0.933333	0.00758382
Female_PGC#4	YBX2	0.141857	0.798013	1.08637	1.93252	0.230528
Female_PGC#3	YEATS4	1.68937	3.15591	4.36347	2.41414	2.50605
Female_PGC#2	YPEL1	0.339221	1.68686	0.405401	1.16231	0.7477
Female_PGC#1	YPEL2	2.48251	1.75878	1.13235	2.18152	1.14024
Female_PGC#4	YPEL5	2.59828	4.20112	4.32767	5.06112	3.03756
Female_PGC#3	YTHDC2	1.39954	2.03854	2.97825	2.12353	1.12958
Female_PGC#3	YTHDF2	4.07774	4.42602	5.50847	4.63013	3.7214
Female_PGC#1	YWHAB	6.05768	5.42931	3.3204	5.09819	5.24334
Female_PGC#4	YWHAH	1.47346	1.00454	2.03507	2.99039	4.85514
Female_PGC#3	YY2	0.336691	2.06937	2.16335	1.7207	0.0169252
[truncated: 60 more rows]
